# 1 Protein solubility is controlled by global structural flexibility

2  
3 Bikash K. Bhandari<sup>1</sup>, Paul P. Gardner<sup>1,2</sup>, Chun Shen Lim<sup>1,\*</sup>

4  
5 <sup>1</sup>Department of Biochemistry, School of Biomedical Sciences, University of Otago, Dunedin,  
6 New Zealand

7 <sup>2</sup>Biomolecular Interaction Centre, University of Canterbury, Christchurch, New Zealand

8  
9 \*Corresponding author. Email: [chunshen.lim@otago.ac.nz](mailto:chunshen.lim@otago.ac.nz)

## 10 11 12 **ABSTRACT**

### 13 **Summary**

14 Recombinant protein production is a widely used technique in the biotechnology industry and  
15 biomedical research, yet only a quarter of target proteins are soluble and can be purified.  
16 Failures are largely due to low protein expression and solubility. We have discovered that  
17 global structural flexibility, which can be modeled by normalised B-factors, accurately  
18 predicts the solubility of 12,216 recombinant proteins expressed in *Escherichia coli*. We have  
19 optimised B-factors, and derived a new set of values for solubility scoring that further  
20 improves the prediction accuracy. We call this new predictor the ‘Solubility-Weighted Index’  
21 (SWI). Importantly, SWI outperforms many existing protein solubility prediction tools. We  
22 have developed ‘SoDoPE’ (Soluble Domain for Protein Expression), a web interface that  
23 allows users to choose a protein region of interest for predicting and maximising both protein  
24 expression and solubility.

### 25 26 **Availability**

27 The SoDoPE web server and source code are freely available at <https://tisigner.com/sodope>  
28 and <https://github.com/Gardner-Binflab/TIsigner>, respectively.  
29 The code and data for reproducing our analysis can be found at  
30 [https://github.com/Gardner-Binflab/SoDoPE\\_paper\\_2019](https://github.com/Gardner-Binflab/SoDoPE_paper_2019).

## 31 32 33 34 **INTRODUCTION**

35 High levels of protein expression and solubility are two major requirements of successful  
36 recombinant protein production (Esposito and Chatterjee 2006). However, recombinant  
37 protein production is a challenging process because almost half of the proteins fail to be  
38 expressed and half of the successfully expressed proteins are insoluble  
39 (<http://targetdb.rcsb.org/metrics/>). These failures hamper protein research, with particular  
40 implications for structural, functional and pharmaceutical studies, that require soluble and  
41 concentrated protein samples (Kramer *et al.* 2012, Hou *et al.* 2018). Therefore, predicting  
42 solubility, and engineering protein sequences for enhanced solubility is an active area of  
43 research. Notable protein engineering approaches include mutagenesis, truncation (i.e.,  
44 expression of partial protein sequences), or fusion with a solubility-enhancing tag (Waldo

45 2003, Esposito and Chatterjee 2006, Trevino *et al.* 2007, Chan *et al.* 2010, Kramer *et al.*  
46 2012, Costa *et al.* 2014).

47  
48 Protein solubility depends on extrinsic factors such as ionic strength, temperature and pH, as  
49 well as intrinsic factors—the physicochemical properties of the protein sequence and  
50 structure—molecular weight, amino acid composition, hydrophobicity, aromaticity, isoelectric  
51 point, structural propensities and the polarity of surface residues (Wilkinson and Harrison  
52 1991, Chiti *et al.* 2003, Tartaglia *et al.* 2004, Diaz *et al.* 2010). Many solubility prediction tools  
53 have been developed around these features, ranging from the use of simple statistical  
54 models (e.g., linear and logistic regressions) to sophisticated machine learning models (e.g.,  
55 support vector machines and neural networks) (Hirose and Noguchi 2013, Habibi *et al.* 2014,  
56 Hebditch *et al.* 2017, Sormanni *et al.* 2017, Heckmann *et al.* 2018, Wu *et al.* 2019, Yang *et*  
57 *al.* 2019).

58  
59 In this study, we investigated the experimental outcomes of 12,216 recombinant proteins  
60 expressed in *Escherichia coli* from the ‘Protein Structure Initiative: Biology’ (PSI: Biology)  
61 (Chen *et al.* 2004, Acton *et al.* 2005). We showed that protein structural flexibility is more  
62 accurate than other protein sequence properties in predicting solubility (Vihinen *et al.* 1994,  
63 Craveur *et al.* 2015). Flexibility is a standard feature that has previously been overlooked in  
64 solubility prediction. On this basis, we derived a set of 20 values for the standard amino acid  
65 residues and used them to predict solubility. We call this new predictor the  
66 ‘Solubility-Weighted Index’ (SWI). SWI is a powerful predictor of solubility, and a good proxy  
67 for global structural flexibility. In addition, SWI outperforms many protein solubility prediction  
68 tools.

69  
70  
71

## 72 **RESULTS**

### 73 **Global structural flexibility performs well at predicting protein solubility**

74 To determine which protein sequence properties can accurately predict protein solubility, we  
75 examined the experimental outcomes of 12,216 recombinant proteins expressed in *E. coli*  
76 (the PSI: Biology dataset; see Supplementary Table S1A) (Chen *et al.* 2004, Acton *et al.*  
77 2005). These proteins were expressed either with a C-terminal or N-terminal 6xHis fusion  
78 tag (pET21\_NESG and pET15\_NESG expression vectors, N=8,780 and 3,436,  
79 respectively). They were previously curated and labeled as ‘Protein\_Soluble’ or  
80 ‘Tested\_Not\_Soluble’ (Seiler *et al.* 2014), based on the soluble analysis of cell lysate using  
81 SDS-PAGE (Xiao *et al.* 2010). A total of 8,238 recombinant proteins were found to be  
82 soluble, in which 6,432 of them belong to the pET21\_NESG dataset.

83  
84 We first computed the standard protein sequence properties, namely molecular weight,  
85 isoelectric point, secondary structure composition (sheet, turn, and helix), aromaticity, Grand  
86 Average of Hydropathy (GRAVY), global structural flexibility and instability index using the  
87 ProtParam module of Biopython (Kyte and Doolittle 1982, Guruprasad *et al.* 1990, Bjellqvist  
88 *et al.* 1993, 1994, Lobry and Gautier 1994, Vihinen *et al.* 1994, Cock *et al.* 2009). We  
89 compared the prediction accuracy of these features using Receiver Operating Characteristic  
90 (ROC) analysis. To our surprise, flexibility outperformed other features in predicting protein

91 solubility [Fig 1, Area Under the ROC Curve (AUC) = 0.67]. We then calculated 9,920  
92 miscellaneous protein sequence properties using the 'protr' R package (Xiao *et al.* 2015),  
93 which include amino acid composition, pseudo-amino acid composition, autocorrelation,  
94 CTD (Composition, Transition, Distribution), conjoint triad descriptors, quasi-sequence-order  
95 descriptors and profile-based descriptors (Xiao *et al.* 2015). Among these features, the  
96 amphiphilic pseudo-amino acid composition for cysteine residues showed the highest AUC  
97 score, which is still lower than the AUC score for flexibility (Supplementary Fig S1 and Table  
98 S2, AUC = 0.65).

99

100

101

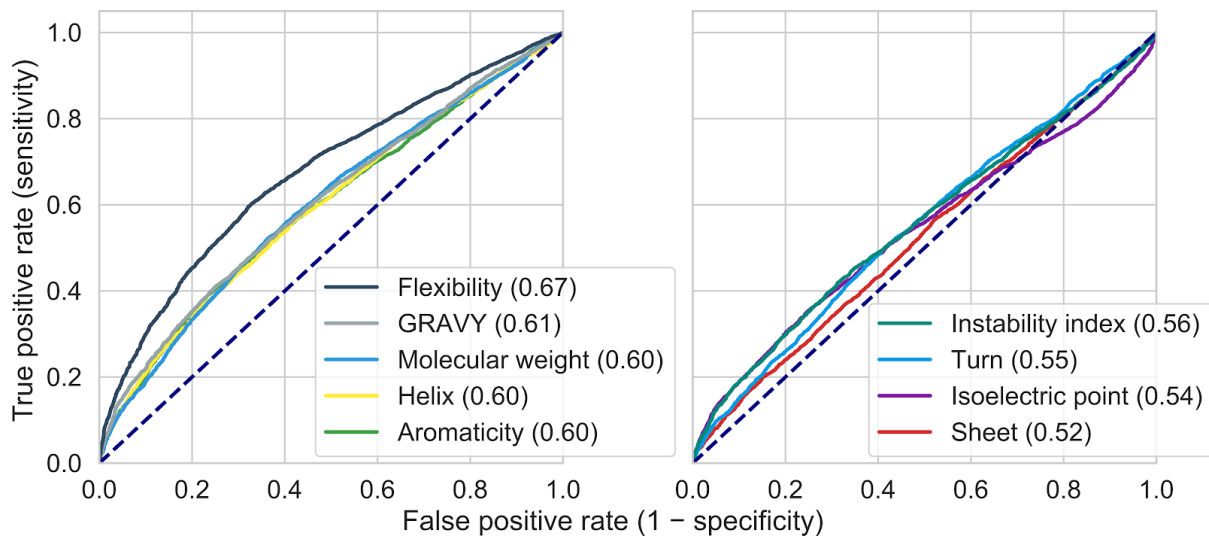

102

103 **Fig 1. Global structural flexibility outperforms the other standard protein sequence**  
104 **properties in protein solubility prediction.** ROC analysis of the standard protein  
105 sequence features for predicting the solubility of 12,216 recombinant proteins expressed in  
106 *E. coli* (the PSI:BiologY dataset). AUC scores (perfect = 1.00, random = 0.50) are shown in  
107 parentheses. The ROC curves are shown in two separate panels for clarity. Dashed lines  
108 denote the performance of random classifiers. AUC, Area Under the ROC Curve; GRAVY,  
109 Grand Average of Hydropathy; PSI:BiologY, Protein Structure Initiative:BiologY; ROC,  
110 Receiver Operating Characteristic.

111

112

### 113 **The Solubility-Weighted Index (SWI) is an improved approach to score solubility**

114 Protein structural flexibility, in particular, the flexibility of local regions, is often associated  
115 with function (Craveur *et al.* 2015). The calculation of flexibility is usually performed by  
116 assigning a set of 20 normalised B-factors—a measure of vibration of C alpha atoms (see  
117 Discussion)—to a protein sequence and averaging the values by a sliding window approach  
118 (Karplus and Schulz 1985, Ragone *et al.* 1989, Vihinen *et al.* 1994, Smith *et al.* 2003). We  
119 reasoned that such sliding window can be approximated by a more straightforward  
120 arithmetic mean for calculating global structural flexibility, which is analogous to the  
121 computation of GRAVY. We applied this arithmetic mean approach to the PSI:BiologY  
122 dataset and compared different sets of published, normalised B-factors (Bhaskaran and  
123 Ponnuswamy 1988, Ragone *et al.* 1989, Vihinen *et al.* 1994, Smith *et al.* 2003) as follows:

124

125

$$\frac{1}{L} \left( \sum_{i=1}^L B_i \right) \quad (1)$$

126

127 where  $B_i$  is the normalised B-factor of the amino acid residue at the position  $i$ , and  $L$  is the  
128 sequence length. Among these sets of B-factors, solubility scoring using the most recently  
129 published set of normalised B-factors produced the highest AUC score (Supplementary Fig  
130 S2, AUC = 0.66).

131

132 To improve the prediction accuracy, we initialised an iterative refinement method with the  
133 most recently published set of normalised B-factors. This was done by maximising AUC  
134 scores with the Nelder-Mead optimisation algorithm (Nelder and Mead 1965). In order to  
135 account for phylogenetic relationships between proteins we clustered all 12,216 PSI:Biography  
136 protein sequences by 10% similarity using USEARCH (Fig 2A and Supplementary Fig S3).  
137 Cross-validations were conducted in a way that ensures training and testing is performed on  
138 unrelated sequences. We calculated the solubility scores for the optimised weights using  
139 Equation 1 and the AUC scores for each cross-validation step. Our training and test AUC  
140 scores were  $0.72 \pm 0.00$  and  $0.71 \pm 0.03$ , respectively, showing an improvement over  
141 flexibility in solubility prediction (mean  $\pm$  standard deviation; Fig 2B and Supplementary  
142 Table S3).

143

144 The final weights were derived from the arithmetic means of the weights for individual amino  
145 acid residues obtained from the cross-validation step (Supplementary Table S4).  
146 Interestingly, we observed over a 20% change on the weights for cysteine (C) and histidine  
147 (H) residues (Fig 2C and Supplementary Table S4). These results were in agreement with  
148 the contributions of cysteine and histidine residues as shown by the AUC scores of the  
149 amphiphilic pseudo-amino acid compositions for cysteine and histidine residues  
150 (Supplementary Fig S1B). To ensure that these results are not artifacts, in particular due to  
151 the presence of polyhistidine-tags in all the sequences, we repeated the iterative refinement  
152 method using the same cross-validation sets without His tag sequences. The final weights  
153 with and without His tags are nearly identical, suggesting that the approach is not  
154 confounded by tag use (Supplementary Table S4, Spearman's rho = 1).

155

156

157

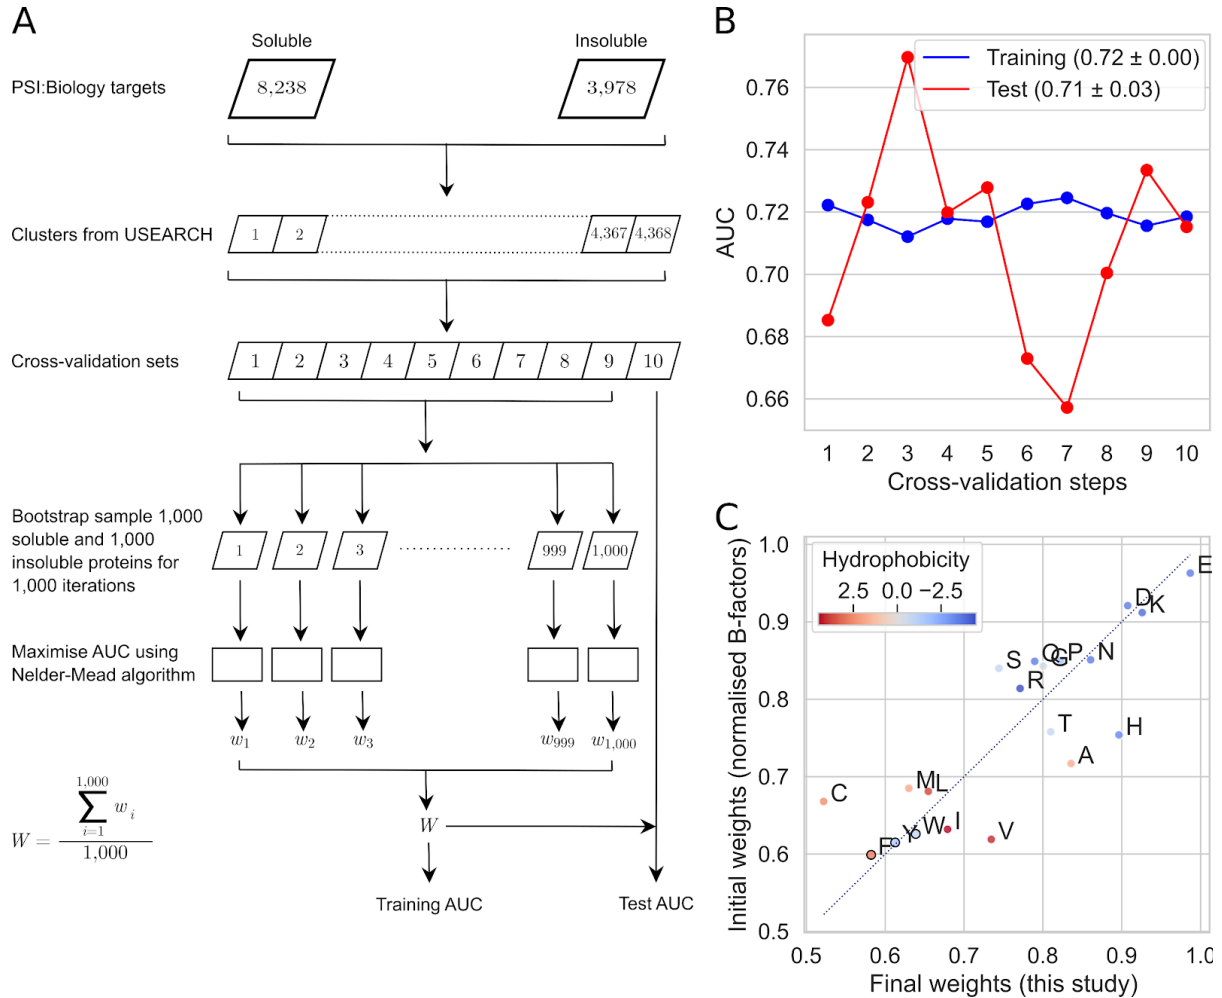

158

159 **Fig 2. Derivation of the Solubility-Weighted Index (SWI).** (A) Flow chart shows an  
 160 iterative refinement of the most recently published set of normalised B-factors for solubility  
 161 prediction (Smith *et al.* 2003). The solubility score of a protein sequence was calculated  
 162 based on an arithmetic mean of the optimised weights as Equation 1 (using  $W$  instead of  $B$   
 163 ). These scores were used to compute the AUC scores for training and test datasets. (B)  
 164 Training and test performance of solubility prediction using the optimised weights for 20  
 165 amino acid residues in a 10-fold cross-validation (mean AUC ± standard deviation). Related  
 166 data and figures are available as Supplementary Table S3 and Supplementary Fig S3. (C)  
 167 Comparison between the 20 initial and final weights for amino acid residues. The final  
 168 weights are derived from the arithmetic mean of the optimised weights from the  
 169 cross-validation step. These weights are used to calculate SWI, the solubility score of a  
 170 protein sequence, in the subsequent analyses. Filled circles, which represent amino acid  
 171 residues, are colored by hydrophobicity (Kyte and Doolittle 1982). Solid black circles denote  
 172 aromatic amino acid residues phenylalanine (F), tyrosine (Y), tryptophan (W). Dotted  
 173 diagonal line represents no change in weight. Related data is available as Supplementary  
 174 Table S4. AUC, Area Under the ROC Curve; ROC, Receiver Operating Characteristic;  $W$ ,  
 175 arithmetic mean of the weights of an amino acid residue optimised from 1,000 bootstrap  
 176 samples in a cross-validation step.

177

178

179 To validate the cross-validation results, we used an independent dataset known as eSOL  
 180 (Niwa *et al.* 2009). This dataset consists of the solubility percentages of *E. coli* proteins  
 181 determined using an *E. coli* cell-free system (N = 3,198). Solubility scoring using the final  
 182 weights showed a significant improvement in correlation with *E. coli* protein solubility over  
 183 the initial weights (normalised B-factors) [Spearman's rho of 0.50 ( $P = 9.46 \times 10^{-206}$ ) vs 0.40  
 184 ( $P = 4.57 \times 10^{-120}$ )]. We call the solubility score of a protein sequence calculated using the  
 185 final weights as the Solubility-Weighted Index (SWI).

186  
 187 We performed Spearman's correlation analysis for both the PSI:BiologY and eSOL datasets.  
 188 SWI shows the strongest correlation with solubility compared to the standard and 9,920  
 189 protein sequence properties (Fig 3 and Supplementary Fig S1). SWI also strongly correlates  
 190 with flexibility, suggesting that SWI is still a good proxy for global structural flexibility.

191  
 192  
 193

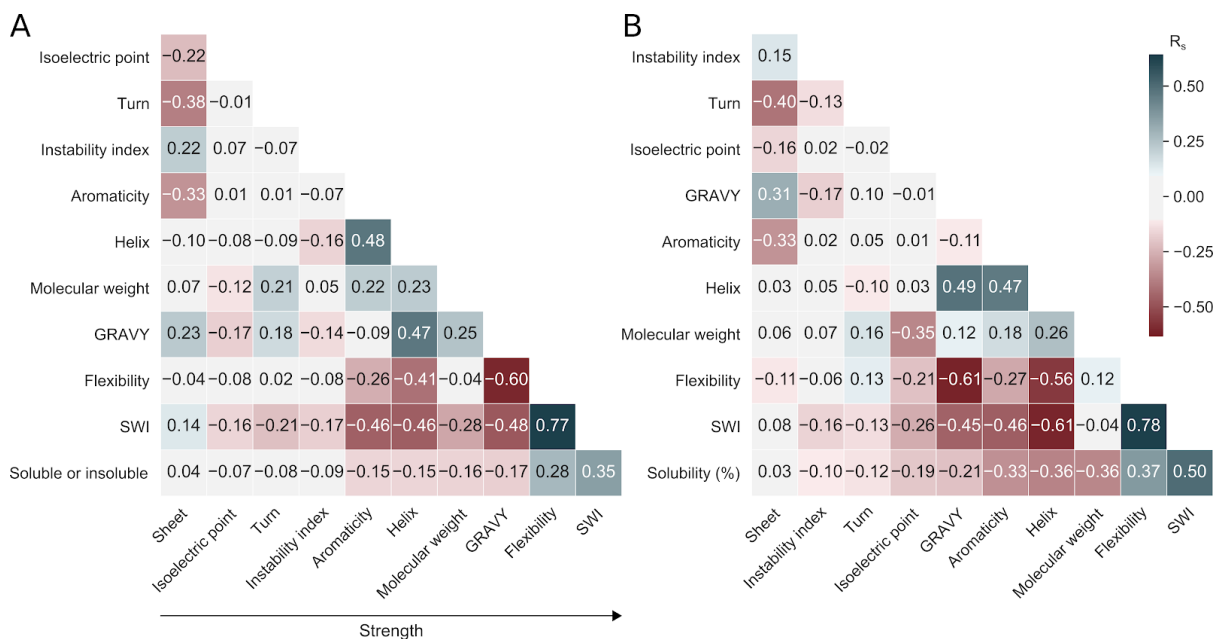

194  
 195 **Fig 3. SWI strongly correlates with solubility.** (A) Correlation matrix plot of the solubility of  
 196 recombinant proteins expressed in *E. coli* and their standard protein sequence properties  
 197 and SWI. These recombinant proteins are the PSI:BiologY targets (N = 12,216) with a  
 198 solubility status of 'Protein\_Soluble' or 'Tested\_Not\_Soluble'. Related data is available as  
 199 Supplementary Table S5. (B) Correlation matrix plot of the solubility percentages of *E. coli*  
 200 proteins and their standard protein sequence properties and SWI. The solubility percentages  
 201 were previously determined using an *E. coli* cell-free system (eSOL, N=3,198). Related data  
 202 is available as Supplementary Table S6. GRAVY, Grand Average of Hydropathy;  
 203 PSI:BiologY, Protein Structure Initiative:BiologY;  $R_s$ , Spearman's rho; SWI,  
 204 Solubility-Weighted Index.

205  
 206

207 Next, we asked whether protein solubility can be predicted by surface amino acid residues.  
 208 To address this question, we examined a previously published dataset for the protein surface  
 209 'stickiness' of 397 *E. coli* proteins (Levy *et al.* 2012). This dataset has the annotation for

210 surface residues based on the protein crystal structures. Interestingly, we observed no  
211 correlation between the protein surface 'stickiness' and the solubility data from eSOL  
212 (Spearman's rho = 0.05, P = 0.34). Optimising weights for surface residues as above led to  
213 no further improvements (i.e., the approach used to derive SWI; Spearman's rho = 0.05, P =  
214 0.31). In contrast, the SWI for these sequences has a significant correlation with solubility  
215 (Spearman's rho = 0.45, P =  $3.88 \times 10^{-19}$ ). These results suggest that full-length sequence  
216 should be taken into account when predicting protein solubility.

217  
218 To understand the properties of soluble and insoluble proteins, we determined the  
219 enrichment of amino acid residues in the PSI:BiologY targets relative to the eSOL sequences  
220 (see Methods). We observed that the PSI:BiologY targets are enriched in charged residues  
221 lysine (K), glutamate (E) and aspartate (D), and depleted in aromatic residues tryptophan  
222 (W), albeit to a lesser extent for insoluble proteins (Fig 4A). As expected, cysteine residues  
223 (C) are enriched in the PSI:BiologY insoluble proteins, supporting previous findings that  
224 cysteine residues contribute to poor solubility in the *E. coli* expression system (Wilkinson and  
225 Harrison 1991, Diaz *et al.* 2010).

226  
227 In addition, we compared the SWI for random sequences with the PSI:BiologY and eSOL  
228 sequences. In general, soluble proteins have higher SWI than insoluble proteins (Fig 4B).  
229 Interestingly, true biological sequences tend to have higher SWI than random sequences,  
230 highlighting a clear evolutionary selection for solubility.

231  
232  
233

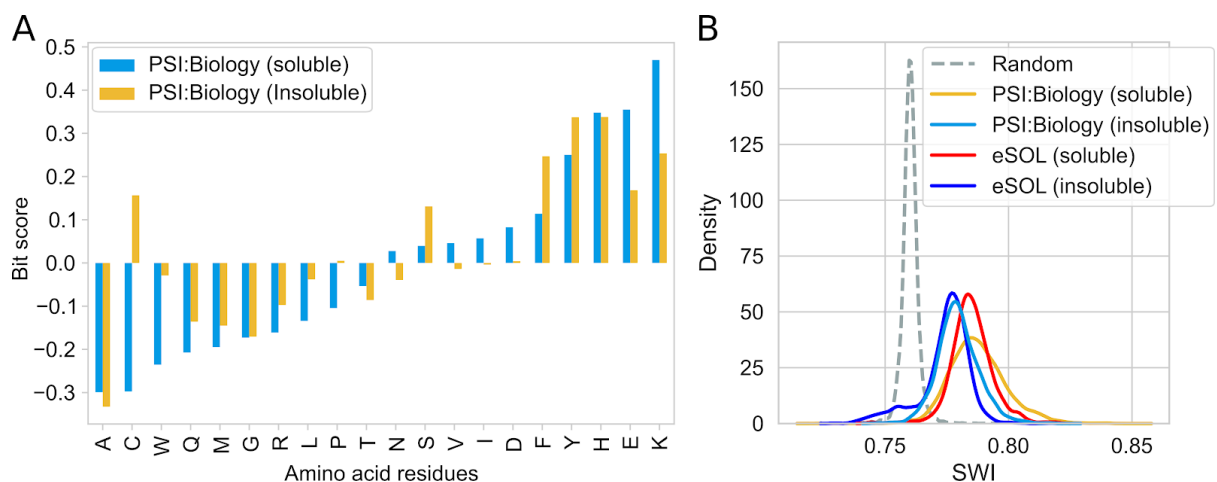

234  
235 **Fig 4. Properties of soluble and insoluble proteins. (A)** Enrichment of amino acid  
236 residues in the PSI:BiologY targets relative to eSOL sequences (N = 12,216 and 3,198,  
237 respectively). **(B)** Distribution of the SWI for soluble and insoluble proteins, and random  
238 sequences. eSOL sequences were grouped into soluble and insoluble proteins, i.e. <30%  
239 and >70% solubilities, respectively (Niwa *et al.* 2009) (Supplementary Table S1B). Random  
240 sequences were generated from a length of 50 to 6,000 amino acid residues, with an  
241 increment of 50 residues. A total of 12,000 random sequences were generated, 100  
242 sequences for each length. PSI:BiologY, Protein Structure Initiative:BiologY; SWI,  
243 Solubility-Weighted Index.

244

245  
246  
247  
248  
249  
250  
251  
252  
253  
254  
255  
256

### SWI outperforms many protein solubility prediction tools

To confirm the usefulness of SWI in solubility prediction, we compared it with the existing tools including Protein-Sol (Hebditch *et al.* 2017), CamSol v2.1 (Sormanni *et al.* 2015, 2017), PaRSnIP (Rawi *et al.* 2018), DeepSol v0.3 (Khurana *et al.* 2018), the Wilkinson-Harrison model (Wilkinson and Harrison 1991, Davis *et al.* 1999, Harrison 2000), and ccSOL omics (Agostini *et al.* 2014). SWI outperforms other tools except for Protein-Sol in predicting *E. coli* protein solubility (Table 1). SWI is also the fastest solubility prediction algorithm (Table 1, Fig 5 and Supplementary Table S7).

**Table 1.** Comparison of protein solubility prediction methods and software.

|             | Approaches                                                                                                                                                                                                                                                                                                                                                                                                                                | Features      | Runtime <sup>a</sup><br>(s per sequence) | PSI:Biolog <sup>b</sup><br>(AUC) | eSOL <sup>b</sup><br>[R <sub>s</sub> (P-value)]  |
|-------------|-------------------------------------------------------------------------------------------------------------------------------------------------------------------------------------------------------------------------------------------------------------------------------------------------------------------------------------------------------------------------------------------------------------------------------------------|---------------|------------------------------------------|----------------------------------|--------------------------------------------------|
| SWI         | <ul style="list-style-type: none"> <li>Arithmetic mean (this study).</li> <li>A set of 20 values for amino acid residues derived from normalised B-factors (Smith <i>et al.</i> 2003) by the Nelder-Mead simplex algorithm.</li> <li>Trained and tested using the PSI:Biolog dataset curated by DNASU (Seiler <i>et al.</i> 2014).</li> <li>Available at <a href="https://tisigner.com/sodope">https://tisigner.com/sodope</a></li> </ul> | 1             | <b>0.00 ± 0.00</b>                       | <b>0.71 ± 0.03<sup>c</sup></b>   | 0.50<br>(9.46 x 10 <sup>-206</sup> )             |
| Protein-Sol | <ul style="list-style-type: none"> <li>Linear model (Hebditch <i>et al.</i> 2017).</li> <li>Trained and tested using eSOL dataset (Niwa <i>et al.</i> 2009).</li> <li>Available at <a href="https://protein-sol.manchester.ac.uk/">https://protein-sol.manchester.ac.uk/</a></li> </ul>                                                                                                                                                   | 10            | 1.16 ± 0.75                              | 0.68                             | <b>0.54</b><br>(2.37 x 10 <sup>-240</sup> )      |
| Flexibility | <ul style="list-style-type: none"> <li>A sliding window of 9 amino acid residues (Vihinen <i>et al.</i> 1994).</li> <li>Normalised B-factors derived from PDB.</li> <li>Available at <a href="https://github.com/biopython/biopython">https://github.com/biopython/biopython</a></li> </ul>                                                                                                                                               | 1             | 0.38 ± 0.04                              | 0.67                             | 0.37<br>(7.73 x 10 <sup>-106</sup> )             |
| DeepSol S2  | <ul style="list-style-type: none"> <li>Neural network models (Khurana <i>et al.</i> 2018).</li> <li>Trained and tested using a PSI:Biolog dataset curated by ccSOL omics.</li> </ul>                                                                                                                                                                                                                                                      | 57 (11 types) | 2069.77 ± 1613.63                        | 0.67 <sup>d</sup>                | 0.23<br>(5.82 x 10 <sup>-41</sup> ) <sup>d</sup> |
| DeepSol     |                                                                                                                                                                                                                                                                                                                                                                                                                                           |               | 2075.93 ±                                | 0.66 <sup>d</sup>                | 0.35                                             |



|                             |                                                                                                                                                                                                                                                                                                                                                                            |                  |                   |                   |                                  |
|-----------------------------|----------------------------------------------------------------------------------------------------------------------------------------------------------------------------------------------------------------------------------------------------------------------------------------------------------------------------------------------------------------------------|------------------|-------------------|-------------------|----------------------------------|
| S3                          | <ul style="list-style-type: none"> <li>Available at <a href="https://github.com/sameerkhurana10/DSOL_rv0.2">https://github.com/sameerkhurana10/DSOL_rv0.2</a></li> </ul>                                                                                                                                                                                                   |                  | 1613.80           |                   | $(7.48 \times 10^{-91})^d$       |
| DeepSol S1                  |                                                                                                                                                                                                                                                                                                                                                                            |                  | 2081.93 ± 1612.71 | 0.64 <sup>d</sup> | 0.39 $(9.52 \times 10^{-116})^d$ |
| CamSol intrinsic web server | <ul style="list-style-type: none"> <li>Linear and logistic regression models (Sormanni <i>et al.</i> 2015, 2017).</li> <li>Trained and tested using previously published datasets (Família <i>et al.</i> 2015).</li> <li>Available at <a href="http://www.vendruscolo.ch.cam.ac.uk/camsolmethod.html">http://www.vendruscolo.ch.cam.ac.uk/camsolmethod.html</a></li> </ul> | 4                | NA                | 0.66              | 0.43 $(4.53 \times 10^{-148})$   |
| PaRSnIP                     | <ul style="list-style-type: none"> <li>Gradient boosting machine model (Rawi <i>et al.</i> 2018).</li> <li>Trained and tested using a PSI:BiologY dataset curated by ccSOL omics.</li> <li>Available at <a href="https://github.com/RedaRawi/PaRSnIP">https://github.com/RedaRawi/PaRSnIP</a></li> </ul>                                                                   | 8,477 (14 types) | 2055.50 ± 1621.11 | 0.61              | 0.29 $(3.57 \times 10^{-65})$    |
| Wilkinson-Harrison model    | <ul style="list-style-type: none"> <li>Linear model using charge average and turn-forming residue fraction (Wilkinson and Harrison 1991, Davis <i>et al.</i> 1999, Harrison 2000).</li> <li>Available at <a href="https://github.com/brunoVbio-tools-solubility-wilkinson">https://github.com/brunoVbio-tools-solubility-wilkinson</a></li> </ul>                          | 2                | 0.09 ± 0.00       | 0.55              | -0.06 $(1.16 \times 10^{-4})$    |
| ccSOL omics web server      | <ul style="list-style-type: none"> <li>Support vector machine model (Agostini <i>et al.</i> 2014).</li> <li>Trained and tested using a PSI:BiologY dataset curated in-house.</li> <li>Available at <a href="http://s.tartaglialab.com/new_submission/ccsol_omics_file">http://s.tartaglialab.com/new_submission/ccsol_omics_file</a></li> </ul>                            | 5                | NA                | 0.51              | -0.02 (0.18)                     |

257 Boldface values are the best results.

258 <sup>a</sup>The runtime was reported at the level of machine precision (mean seconds ± standard  
259 deviation). A total of 10 sequences were chosen from the PSI:BiologY and eSOL datasets,  
260 related to Fig 5 (see Methods).

261 <sup>b</sup>The sample sizes for PSI:BiologY and eSOL datasets are 12,216 and 3,198, respectively.

262 <sup>c</sup>Mean AUC ± standard deviation calculated from a 10-fold cross-validation (see Methods).

263 <sup>d</sup>DeepSol reports solubility prediction as probability and binary classes. The probability of  
264 solubility was used to calculate AUC and Spearman's correlation due to better results.

265 AUC, Area Under the ROC Curve; NA, not applicable; PDB, Protein Data Bank; PSI:Biolog  
266 Protein Structure Initiative:Biolog; ROC, Receiver Operating Characteristic;  $R_s$ , Spearman's  
267 rho; SWI, Solubility-Weighted Index; s, seconds.

268  
269  
270

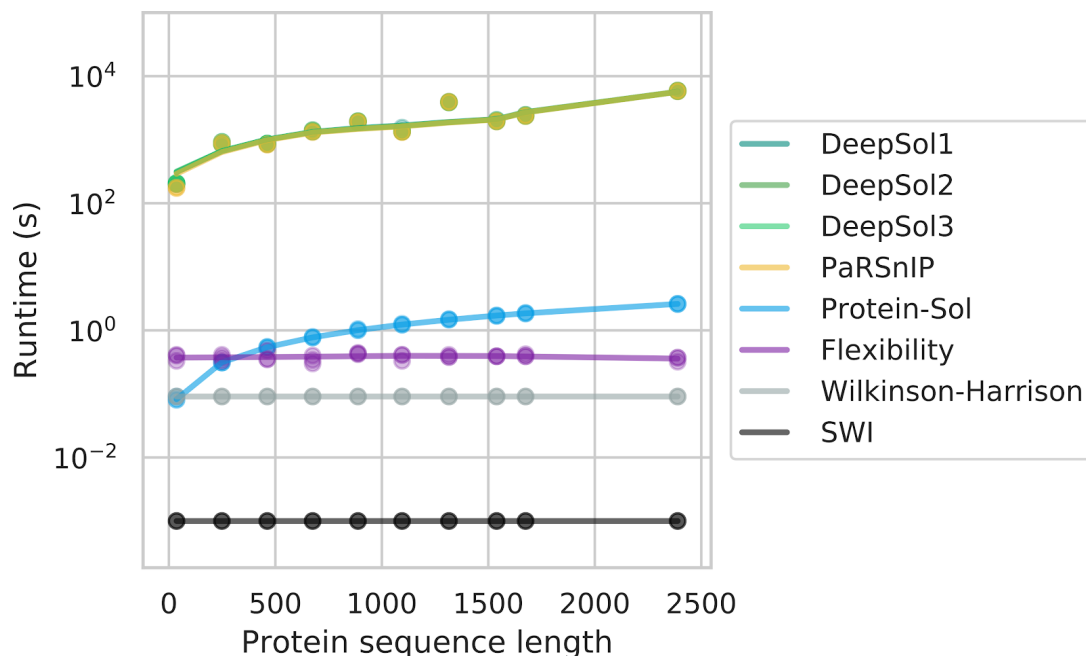

271  
272 **Fig 5. Runtime of protein solubility prediction tools per sequence.** All the tools were run  
273 three times using 10 sequences selected from the PSI:Biolog and eSOL datasets. A  
274 pseudocount of 0.001 s was used because the runtime of our SWI C program is 0.00 s per  
275 sequence, which is determined by machine precision. Related data is available as  
276 Supplementary Table S7. SWI, Solubility-Weighted Index; s, seconds.

277  
278  
279 To demonstrate a use case for SWI, we developed the Soluble Domain for Protein  
280 Expression (SoDoPE) web server (see Methods and <https://tisigner.com/sodope>). Upon  
281 sequence submission, the SoDoPE web server enables users to navigate the protein  
282 sequence and its domains for predicting and maximising protein expression and solubility.

283  
284  
285

## 286 DISCUSSION

287 The B-factor or temperature factor of the atoms in a crystalline structure is the measure of  
288 vibration around their mean position ( $u$ ) that reflects the uncertainty in X-ray scattering  
289 structure determination (Schlessinger and Rost 2005, Bramer and Wei 2018, Carugo 2018).

290  
291  
292

$$291 \quad B = 8\pi^2 u \quad (2)$$

293 The profile of normalised B-factors along a protein sequence can be used to infer the  
294 flexibility and dynamics of the protein structure (Karplus and Schulz 1985, Vihinen *et al.*

295 1994). Protein structural flexibility has been associated with conformational variations, functions,  
296 thermal stability, ligand binding and disordered regions (Vihinen 1987, Teague 2003,  
297 Radivojac 2004, Ma 2005, Schlessinger and Rost 2005, Yuan *et al.* 2005, Yin *et al.* 2011).  
298 However, the use of flexibility in solubility prediction has been overlooked although their  
299 relationship has previously been proposed (Tsumoto *et al.* 2003). In this study, we have  
300 shown that flexibility strongly correlates with solubility (Fig 3). Based on the normalised  
301 B-factors used to compute flexibility, we have derived a new position and length independent  
302 weights to score the solubility of a given protein sequence. We call this protein solubility  
303 score as SWI.

304  
305 Upon further inspection, we observe some interesting properties in SWI. SWI anti-correlates  
306 with helix propensity, GRAVY, aromaticity and isoelectric point (Fig 2C and 3). Amino acid  
307 residues with a lower aromaticity or hydrophilic are known to improve protein solubility (Han  
308 *et al.* n.d., Wilkinson and Harrison 1991, Trevino *et al.* 2007, Niwa *et al.* 2009, Kramer *et al.*  
309 2012, Warwicker *et al.* 2014). Consistent with previous studies, the charged residues  
310 aspartate (D), glutamate (E) and lysine (K) are associated with high solubility, whereas the  
311 aromatic residues phenylalanine (F), tryptophan (W) and tyrosine (Y) are associated with low  
312 solubility (Fig 2C and 4A). Interestingly, histidine residue (H) appears as one of the heavily  
313 weighted residues in scoring solubility, which might be due to its positive charge. In contrast,  
314 cysteine residue (C) has been strongly downweighted, probably because disulfide bonds  
315 couldn't be properly formed in the *E. coli* expression hosts (Stewart *et al.* 1998, Aslund and  
316 Beckwith 1999, Rosano and Ceccarelli 2014, Jia and Jeon 2016). The weights are likely  
317 different if the solubility analysis was done using the reductase-deficient, *E. coli* Origami host  
318 strains, or eukaryotic hosts.

319  
320 Higher helix propensity has been reported to increase solubility (Idicula-Thomas and Balaji  
321 2005, Huang *et al.* 2012). However, our analysis has shown that helical and turn  
322 propensities anti-correlate with solubility, whereas sheet propensity lacks correlation with  
323 solubility, suggesting that disordered regions may tend to be more soluble (Fig 3). In  
324 accordance with these, SWI has stronger negative correlations with helix and turn  
325 propensities. These findings also suggest that protein solubility can be largely explained by  
326 overall amino acid composition, not just the surface amino acid residues. This idea aligns  
327 with our understanding that protein solubility and folding are closely linked, and folding  
328 occurs cotranscriptionally, a complex process that is driven various intrinsic and extrinsic  
329 factors (Wilkinson and Harrison 1991, Chiti *et al.* 2003, Tartaglia *et al.* 2004, Diaz *et al.*  
330 2010). However, it is unclear why sheet propensity has little contribution to solubility because  
331  $\beta$ -sheets have been shown to link closely with protein aggregation (Idicula-Thomas and  
332 Balaji 2005).

333  
334 We conclude that SWI is a well-balanced index that is relatively simple and easy to use. To  
335 demonstrate the usefulness of SWI, we developed the SoDoPE web server for predicting  
336 solubility and designing protein sequences (see Methods and <https://tisiigner.com/sodope>). In  
337 addition, SoDoPE is integrated with TIsigner, our gene optimisation web server for protein  
338 expression. This pipeline provides a holistic approach to improve the outcome of  
339 recombinant protein expression.

340

341  
342  
343  
344  
345  
346  
347  
348  
349  
350  
351  
352  
353  
354  
355  
356  
357  
358  
359  
360  
361  
362  
363  
364  
365  
366  
367  
368  
369  
370  
371  
372  
373  
374  
375  
376  
377  
378  
379  
380  
381  
382  
383  
384  
385  
386

## **METHODS**

### **Protein sequence properties**

The standard protein sequence properties were calculated using the Bio.SeqUtils.ProtParam module of Biopython v1.73 (Cock *et al.* 2009). All miscellaneous protein sequence properties were computed using the R package protr v1.6-2 (Xiao *et al.* 2015).

### **Protein solubility prediction**

We used the standard and miscellaneous protein sequence properties to predict the solubility of the PSI:Biology and eSOL targets (N=12,216 and 3,198, respectively) (Niwa *et al.* 2009, Seiler *et al.* 2014). For method comparison, we chose the protein solubility prediction tools that are scalable (Table 1). Default configurations were used for running the command line tools.

To benchmark the runtime of these solubility prediction tools, we selected 10 sequences with a large range of lengths from the PSI:Biology and eSOL datasets (from 36 to 2389 residues). All the tools were run and timed using a single process without using GPU on a high performance computer [/usr/bin/time <command>; CentOS Linux 7 (Core) operating system, 72 cores in 2× Broadwell nodes (E5-2695v4, 2.1 GHz, dual socket 18 cores per socket), 528 GiB memory]. Single sequence fasta files were used as input files.

### **SWI**

To improve protein solubility prediction, we optimised the most recently published set of normalised B-factors using the PSI:Biology dataset (Smith *et al.* 2003) (Fig 2). To avoid bias due to protein sequence homology, we first clustered the PSI:Biology targets using USEARCH v11.0.667, 32-bit (Edgar 2010). His tag sequences were removed from all sequences before clustering to minimise bias. We obtained 4,368 clusters using the parameters: -cluster\_fast <input\_file> -id 0.1 -msaout <output\_file> -threads 4. These clusters were divided into 10 groups with approximately 1,200 sequences per group. The subsequent steps were done with or without His tag sequences. We used the normalised B-factors as the initial weights to maximise AUC using these 10 groups with a 10-fold cross-validation. Since AUC is non-differentiable, we used the Nelder-Mead optimisation method (implemented in SciPy v1.2.0), which is a derivative-free, heuristic, simplex-based optimisation (Nelder and Mead 1965, Oliphant 2007, Millman and Aivazis 2011). For each step in cross-validation, we did bootstrap resampling for 1,000 times with each sample containing 1,000 soluble and 1,000 insoluble proteins. Optimisation was done for each sample, giving 1,000 sets of weights. The arithmetic mean of these weights was used to determine the training and test AUC for the cross-validation step (Fig 2A).

### **Bit score**

To compute the bit scores for each amino acid residue in the PSI:Biology soluble and insoluble groups (Fig 4A), we normalised the count of each residue ( $x$ ) in each group by the

387 total number of residues in that group. We used the normalised count of amino acid residues  
388 using the eSOL sequences as the background. The bit score of residue ( $x$ ) for soluble or  
389 insoluble group is then given by the following equation:

$$390 \text{bit score}(x)_i = \log_2 \left( \frac{f_i(x)}{f_{\text{eSOL}}(x)} \right), i = [\text{soluble}, \text{insoluble}] \quad (3)$$

392 where  $f_i(x)$  is the normalised count of residue ( $x$ ) in the PSI:Biological soluble or insoluble  
393 group and  $f_{\text{eSOL}}(x)$  is the normalised count in the eSOL sequences.

394  
395 For control, random protein sequences were generated by incrementing the length of  
396 sequence, starting from a length of 50 residues to 6,000 residues with a step size of 50  
397 residues. A hundred of random sequences were generated for each length, giving a total of  
398 12,000 unique random sequences.

400  
401

### 402 **The SoDoPE web server**

403 To estimate the probability of solubility using SWI, we fitted the following logistic regression  
404 to the PSI:Biological dataset:

$$405 \text{probability of solubility} = 1/(1 + \exp(-(ax + b))) \quad (4)$$

407  
408 where,  $x$  is the SWI of a given protein sequence,  $a = 81.1496$  and  $b = -62.8379$ . The  
409 P-value of log-likelihood ratio test was less than machine precision. Equation 4 can be used  
410 to predict the solubility of a protein sequence given that the protein is successfully expressed  
411 in *E. coli*.

412  
413 On this basis, we developed a solubility prediction webservice called the Soluble Domain for  
414 Protein Expression (SoDoPE). Our web server accepts either a nucleotide or amino acid  
415 sequence. Upon sequence submission, a query is sent to the HMMER web server to  
416 annotate protein domains (<https://www.ebi.ac.uk/Tools/hmmer/>) (Potter *et al.* 2018). Once  
417 the protein domains are identified, users can choose a domain or any custom region  
418 (including full-length sequence) to examine the probability of solubility, flexibility and GRAVY.  
419 This functionality enables protein biochemists to plan their experiments and opt for the  
420 domains or regions with high probability of solubility. Furthermore, we implemented a  
421 simulated annealing algorithm that maximised the probability of solubility for a given region  
422 by generating a list of regions with extended boundaries. Users can also predict the  
423 improvement in solubility by selecting a commonly used solubility tag or a custom tag.

424

425 We linked SoDoPE with TIsigner, which is our existing web server for maximising the  
426 accessibility of translation initiation site (Bhandari *et al.* 2019). This pipeline allows users to  
427 predict and optimise both protein expression and solubility for a gene of interest. The  
428 SoDoPE web server is freely available at <https://tisigner.com/sodope>.

429  
430

### 431 **Statistical analysis**

432 Data analysis was done using Pandas v0.25.3 (McKinney 2010), scikit-learn v0.20.2  
433 (Pedregosa *et al.* 2011), numpy v1.16.2 (van der Walt *et al.* 2011) and statsmodel  
434 v0.10.1 (Seabold and Perktold 2010). Plots were generated using Matplotlib v3.0.2 (Caswell  
435 *et al.* 2018) and Seaborn v0.9.0 (Waskom *et al.* 2014).

436  
437

### 438 **Code and data availability**

439 Jupyter notebook of our analysis can be found at  
440 [https://github.com/Gardner-Binflab/SoDoPE\\_paper\\_2019](https://github.com/Gardner-Binflab/SoDoPE_paper_2019). The source code for our solubility  
441 prediction server (SoDoPE) can be found at <https://github.com/Gardner-Binflab/TIsigner>.

442  
443  
444

### 445 **ACKNOWLEDGEMENTS**

446 We thank New Zealand eScience Infrastructure for providing a high performance computing  
447 platform. We are grateful to Harry Biggs for proofreading our manuscript and providing  
448 feedback for the web server. This work was supported by the Ministry of Business,  
449 Innovation and Employment, New Zealand (MBIE grant: UOOX1709).

450  
451  
452

### 453 **AUTHOR CONTRIBUTIONS**

454 C.S.L. conceived the work; B.K.B. and C.S.L. analysed the data and C.S.L. contributed  
455 flexibility analysis; B.K.B. and P.P.G. formulated SWI; B.K.B. developed the SoDoPE web  
456 server; B.K.B., P.P.G. and C.S.L. wrote the manuscript.

457  
458  
459

### 460 **COMPETING INTERESTS**

461 The authors declare no competing interests.

462  
463  
464

### 465 **REFERENCES**

466

- 467 Acton, T.B., Gunsalus, K.C., Xiao, R., Ma, L.C., Aramini, J., Baran, M.C., Chiang, Y.-W.,  
468 Climent, T., Cooper, B., Denissova, N.G., Douglas, S.M., Everett, J.K., Ho, C.K.,  
469 Macapagal, D., Rajan, P.K., Shastry, R., Shih, L.-Y., Swapna, G.V.T., Wilson, M., Wu,  
470 M., Gerstein, M., Inouye, M., Hunt, J.F., and Montelione, G.T., 2005. Robotic cloning and  
471 Protein Production Platform of the Northeast Structural Genomics Consortium. *Methods*  
472 *in enzymology*, 394, 210–243.
- 472 Agostini, F., Cirillo, D., Livi, C.M., Delli Ponti, R., and Tartaglia, G.G., 2014. ccSOL omics: a  
473 webserver for solubility prediction of endogenous and heterologous expression in  
474 *Escherichia coli*. *Bioinformatics*, 30 (20), 2975–2977.
- 475 Aslund, F. and Beckwith, J., 1999. The thioredoxin superfamily: redundancy, specificity, and  
476 gray-area genomics. *Journal of bacteriology*, 181 (5), 1375–1379.
- 477 Bhandari, B.K., Lim, C.S., and Gardner, P.P., 2019. Highly accessible translation initiation  
478 sites are predictive of successful heterologous protein expression. *bioRxiv*.

- 479 Bhaskaran, R. and Ponnuswamy, P.K., 1988. Positional flexibilities of amino acid residues in  
480 globular proteins. *International Journal of Peptide and Protein Research*.
- 481 Bjellqvist, B., Basse, B., Olsen, E., and Celis, J.E., 1994. Reference points for comparisons  
482 of two-dimensional maps of proteins from different human cell types defined in a pH  
483 scale where isoelectric points correlate with polypeptide compositions. *Electrophoresis*,  
484 15 (3-4), 529–539.
- 485 Bjellqvist, B., Hughes, G.J., Pasquali, C., Paquet, N., Ravier, F., Sanchez, J.C., Frutiger, S.,  
486 and Hochstrasser, D., 1993. The focusing positions of polypeptides in immobilized pH  
487 gradients can be predicted from their amino acid sequences. *Electrophoresis*, 14 (10),  
488 1023–1031.
- 489 Bramer, D. and Wei, G.-W., 2018. Blind prediction of protein B-factor and flexibility. *The*  
490 *Journal of chemical physics*, 149 (13), 134107.
- 491 Carugo, O., 2018. How large B-factors can be in protein crystal structures. *BMC*  
492 *bioinformatics*, 19 (1), 61.
- 493 Caswell, T.A., Droettboom, M., Hunter, J., Firing, E., Lee, A., Stansby, D., de Andrade, E.S.,  
494 Nielsen, J.H., Klymak, J., Varoquaux, N., Root, B., Elson, P., Dale, D., May, R., Lee,  
495 J.-J., Seppänen, J.K., Hoffmann, T., McDougall, D., Straw, A., Hobson, P., cgohlke, Yu,  
496 T.S., Ma, E., Vincent, A.F., Silvester, S., Moad, C., Katins, J., Kniazhev, N., Ariza, F., and  
497 Würtz, P., 2018. *matplotlib/matplotlib v3.0.2*.
- 498 Chan, W.-C., Liang, P.-H., Shih, Y.-P., Yang, U.-C., Lin, W.-C., and Hsu, C.-N., 2010.  
499 Learning to predict expression efficacy of vectors in recombinant protein production.  
500 *BMC bioinformatics*, 11 Suppl 1, S21.
- 501 Chen, L., Oughtred, R., Berman, H.M., and Westbrook, J., 2004. TargetDB: a target  
502 registration database for structural genomics projects. *Bioinformatics* , 20 (16),  
503 2860–2862.
- 504 Chiti, F., Stefani, M., Taddei, N., Ramponi, G., and Dobson, C.M., 2003. Rationalization of  
505 the effects of mutations on peptide and protein aggregation rates. *Nature*, 424 (6950),  
506 805–808.
- 507 Cock, P.J.A., Antao, T., Chang, J.T., Chapman, B.A., Cox, C.J., Dalke, A., Friedberg, I.,  
508 Hamelryck, T., Kauff, F., Wilczynski, B., and de Hoon, M.J.L., 2009. Biopython: freely  
509 available Python tools for computational molecular biology and bioinformatics.  
510 *Bioinformatics* , 25 (11), 1422–1423.
- 511 Costa, S., Almeida, A., Castro, A., and Domingues, L., 2014. Fusion tags for protein  
512 solubility, purification and immunogenicity in Escherichia coli: the novel Fh8 system.  
513 *Frontiers in microbiology*, 5, 63.
- 514 Craveur, P., Joseph, A.P., Esque, J., Narwani, T.J., Noël, F., Shinada, N., Goguet, M.,  
515 Leonard, S., Poulain, P., Bertrand, O., Faure, G., Rebehmed, J., Ghazlane, A., Swapna,  
516 L.S., Bhaskara, R.M., Barnoud, J., Téletchéa, S., Jallu, V., Cerny, J., Schneider, B.,  
517 Etchebest, C., Srinivasan, N., Gelly, J.-C., and de Brevern, A.G., 2015. Protein flexibility  
518 in the light of structural alphabets. *Frontiers in molecular biosciences*, 2, 20.
- 519 Davis, G.D., Elisee, C., Newham, D.M., and Harrison, R.G., 1999. New fusion protein  
520 systems designed to give soluble expression in Escherichia coli. *Biotechnology and*  
521 *bioengineering*, 65 (4), 382–388.
- 522 Diaz, A.A., Tomba, E., Lennarson, R., Richard, R., Bagajewicz, M.J., and Harrison, R.G.,  
523 2010. Prediction of protein solubility in Escherichia coli using logistic regression.  
524 *Biotechnology and bioengineering*, 105 (2), 374–383.
- 525 Edgar, R.C., 2010. Search and clustering orders of magnitude faster than BLAST.  
526 *Bioinformatics* , 26 (19), 2460–2461.
- 527 Esposito, D. and Chatterjee, D.K., 2006. Enhancement of soluble protein expression through  
528 the use of fusion tags. *Current opinion in biotechnology*, 17 (4), 353–358.
- 529 Família, C., Dennison, S.R., Quintas, A., and Phoenix, D.A., 2015. Prediction of Peptide and

- 530 Protein Propensity for Amyloid Formation. *PloS one*, 10 (8), e0134679.
- 531 Guruprasad, K., Reddy, B.V., and Pandit, M.W., 1990. Correlation between stability of a  
532 protein and its dipeptide composition: a novel approach for predicting in vivo stability of  
533 a protein from its primary sequence. *Protein engineering*, 4 (2), 155–161.
- 534 Habibi, N., Mohd Hashim, S.Z., Norouzi, A., and Samian, M.R., 2014. A review of machine  
535 learning methods to predict the solubility of overexpressed recombinant proteins in  
536 *Escherichia coli*. *BMC bioinformatics*, 15, 134.
- 537 Han, X., Ning, W., Ma, X., Wang, X., and Zhou, K., n.d. Improve Protein Solubility and  
538 Activity based on Machine Learning Models.
- 539 Harrison, R.G., 2000. Expression of soluble heterologous proteins via fusion with NusA  
540 protein. *Innovations*, 11, 4–7.
- 541 Hebditch, M., Carballo-Amador, M.A., Charonis, S., Curtis, R., and Warwicker, J., 2017.  
542 Protein-Sol: a web tool for predicting protein solubility from sequence. *Bioinformatics* ,  
543 33 (19), 3098–3100.
- 544 Heckmann, D., Lloyd, C.J., Mih, N., Ha, Y., Zielinski, D.C., Haiman, Z.B., Desouki, A.A.,  
545 Lercher, M.J., and Palsson, B.O., 2018. Machine learning applied to enzyme turnover  
546 numbers reveals protein structural correlates and improves metabolic models. *Nature*  
547 *communications*, 9 (1), 5252.
- 548 Hirose, S. and Noguchi, T., 2013. ESPRESSO: a system for estimating protein expression  
549 and solubility in protein expression systems. *Proteomics*, 13 (9), 1444–1456.
- 550 Hou, Q., Bourgeas, R., Pucci, F., and Rومان, M., 2018. Computational analysis of the  
551 amino acid interactions that promote or decrease protein solubility. *Scientific Reports*.
- 552 Huang, H.-L., Charoenkwan, P., Kao, T.-F., Lee, H.-C., Chang, F.-L., Huang, W.-L., Ho, S.-J.,  
553 Shu, L.-S., Chen, W.-L., and Ho, S.-Y., 2012. Prediction and analysis of protein solubility  
554 using a novel scoring card method with dipeptide composition. *BMC bioinformatics*, 13  
555 Suppl 17, S3.
- 556 Idicula-Thomas, S. and Balaji, P.V., 2005. Understanding the relationship between the  
557 primary structure of proteins and its propensity to be soluble on overexpression in  
558 *Escherichia coli*. *Protein science: a publication of the Protein Society*, 14 (3), 582–592.
- 559 Jia, B. and Jeon, C.O., 2016. High-throughput recombinant protein expression in *Escherichia*  
560 *coli*: current status and future perspectives. *Open biology*, 6 (8).
- 561 Karplus, P.A. and Schulz, G.E., 1985. Prediction of chain flexibility in proteins. *Die*  
562 *Naturwissenschaften*, 72 (4), 212–213.
- 563 Khurana, S., Rawi, R., Kunji, K., Chuang, G.-Y., Bensmail, H., and Mall, R., 2018. DeepSol:  
564 a deep learning framework for sequence-based protein solubility prediction.  
565 *Bioinformatics* , 34 (15), 2605–2613.
- 566 Kramer, R.M., Shende, V.R., Motl, N., Nick Pace, C., and Martin Scholtz, J., 2012. Toward a  
567 Molecular Understanding of Protein Solubility: Increased Negative Surface Charge  
568 Correlates with Increased Solubility. *Biophysical Journal*.
- 569 Kyte, J. and Doolittle, R.F., 1982. A simple method for displaying the hydropathic character  
570 of a protein. *Journal of molecular biology*, 157 (1), 105–132.
- 571 Levy, E.D., De, S., and Teichmann, S.A., 2012. Cellular crowding imposes global constraints  
572 on the chemistry and evolution of proteomes. *Proceedings of the National Academy of*  
573 *Sciences*.
- 574 Lobry, J.R. and Gautier, C., 1994. Hydrophobicity, expressivity and aromaticity are the major  
575 trends of amino-acid usage in 999 *Escherichia coli* chromosome-encoded genes.  
576 *Nucleic acids research*, 22 (15), 3174–3180.
- 577 Ma, J., 2005. Usefulness and limitations of normal mode analysis in modeling dynamics of  
578 biomolecular complexes. *Structure* , 13 (3), 373–380.
- 579 McKinney, W., 2010. Data Structures for Statistical Computing in Python. *In: Proceedings of*  
580 *the 9th Python in Science Conference*. 51–56.



- 580 Millman, K.J. and Aivazis, M., 2011. Python for Scientists and Engineers. *Computing in*  
581 *Science Engineering*, 13 (2), 9–12.
- 582 Nelder, J.A. and Mead, R., 1965. A Simplex Method for Function Minimization. *Computer*  
583 *Journal*, 7 (4), 308–313.
- 584 Niwa, T., Ying, B.-W., Saito, K., Jin, W., Takada, S., Ueda, T., and Taguchi, H., 2009. Bimodal  
585 protein solubility distribution revealed by an aggregation analysis of the entire ensemble  
586 of Escherichia coli proteins. *Proceedings of the National Academy of Sciences of the*  
587 *United States of America*, 106 (11), 4201–4206.
- 588 Oliphant, T.E., 2007. Python for Scientific Computing. *Computing in Science Engineering*, 9  
589 (3), 10–20.
- 590 Pedregosa, F., Varoquaux, G., Gramfort, A., Michel, V., Thirion, B., Grisel, O., Blondel, M.,  
591 Prettenhofer, P., Weiss, R., Dubourg, V., Vanderplas, J., Passos, A., Cournapeau, D.,  
592 Brucher, M., Perrot, M., and Duchesnay, É., 2011. Scikit-learn: Machine Learning in  
593 Python. *Journal of machine learning research: JMLR*, 12 (Oct), 2825–2830.
- 594 Potter, S.C., Luciani, A., Eddy, S.R., Park, Y., Lopez, R., and Finn, R.D., 2018. HMMER web  
595 server: 2018 update. *Nucleic acids research*, 46 (W1), W200–W204.
- 596 Radivojac, P., 2004. Protein flexibility and intrinsic disorder. *Protein Science*.
- 597 Ragone, R., Facchiano, F., Facchiano, A., Facchiano, A.M., and Colonna, G., 1989.  
598 Flexibility plot of proteins. *'Protein Engineering, Design and Selection'*.
- 599 Rawi, R., Mall, R., Kunji, K., Shen, C.-H., Kwong, P.D., and Chuang, G.-Y., 2018. PaRSnIP:  
600 sequence-based protein solubility prediction using gradient boosting machine.  
601 *Bioinformatics*.
- 602 Rosano, G.L. and Ceccarelli, E.A., 2014. Recombinant protein expression in Escherichia  
603 coli: advances and challenges. *Frontiers in microbiology*, 5, 172.
- 604 Schlessinger, A. and Rost, B., 2005. Protein flexibility and rigidity predicted from sequence.  
605 *Proteins*, 61 (1), 115–126.
- 606 Seabold, S. and Perktold, J., 2010. Statsmodels: Econometric and statistical modeling with  
607 python. In: *Proceedings of the 9th Python in Science Conference*.
- 608 Seiler, C.Y., Park, J.G., Sharma, A., Hunter, P., Surapaneni, P., Sedillo, C., Field, J., Algar,  
609 R., Price, A., Steel, J., Throop, A., Fiacco, M., and LaBaer, J., 2014. DNASU plasmid  
610 and PSI: Biology-Materials repositories: resources to accelerate biological research.  
611 *Nucleic acids research*, 42 (Database issue), D1253–60.
- 612 Sharp, P.M. and Li, W.H., 1987. The codon Adaptation Index—a measure of directional  
613 synonymous codon usage bias, and its potential applications. *Nucleic acids research*,  
614 15 (3), 1281–1295.
- 615 Smith, D.K., Radivojac, P., Obradovic, Z., Dunker, A.K., and Zhu, G., 2003. Improved amino  
616 acid flexibility parameters. *Protein science: a publication of the Protein Society*, 12 (5),  
617 1060–1072.
- 618 Sormanni, P., Amery, L., Ekizoglou, S., Vendruscolo, M., and Popovic, B., 2017. Rapid and  
619 accurate in silico solubility screening of a monoclonal antibody library. *Scientific reports*,  
620 7 (1), 8200.
- 621 Sormanni, P., Aprile, F.A., and Vendruscolo, M., 2015. The CamSol Method of Rational  
622 Design of Protein Mutants with Enhanced Solubility. *Journal of Molecular Biology*.
- 623 Stewart, E.J., Aslund, F., and Beckwith, J., 1998. Disulfide bond formation in the Escherichia  
624 coli cytoplasm: an in vivo role reversal for the thioredoxins. *The EMBO journal*, 17 (19),  
625 5543–5550.
- 626 Tartaglia, G.G., Cavalli, A., Pellarin, R., and Caflich, A., 2004. The role of aromaticity,  
627 exposed surface, and dipole moment in determining protein aggregation rates. *Protein*  
628 *science: a publication of the Protein Society*, 13 (7), 1939.
- 629 Teague, S.J., 2003. Implications of protein flexibility for drug discovery. *Nature reviews. Drug*  
630 *discovery*, 2 (7), 527–541.

- 631 Trevino, S.R., Martin Scholtz, J., and Nick Pace, C., 2007. Amino Acid Contribution to  
632 Protein Solubility: Asp, Glu, and Ser Contribute more Favorably than the other  
633 Hydrophilic Amino Acids in RNase Sa. *Journal of Molecular Biology*.
- 634 Tsumoto, K., Ejima, D., Kumagai, I., and Arakawa, T., 2003. Practical considerations in  
635 refolding proteins from inclusion bodies. *Protein expression and purification*, 28 (1), 1–8.
- 636 Vihinen, M., 1987. Relationship of protein flexibility to thermostability. *Protein Engineering,*  
637 *Design and Selection*.
- 638 Vihinen, M., Torkkila, E., and Riikonen, P., 1994. Accuracy of protein flexibility predictions.  
639 *Proteins*, 19 (2), 141–149.
- 640 Waldo, G.S., 2003. Genetic screens and directed evolution for protein solubility. *Current*  
641 *opinion in chemical biology*, 7 (1), 33–38.
- 642 van der Walt, S., Colbert, S.C., and Varoquaux, G., 2011. The NumPy Array: A Structure for  
643 Efficient Numerical Computation. *Computing in science & engineering*, 13 (2), 22–30.
- 644 Warwicker, J., Charonis, S., and Curtis, R.A., 2014. Lysine and arginine content of proteins:  
645 computational analysis suggests a new tool for solubility design. *Molecular*  
646 *pharmaceutics*, 11 (1), 294–303.
- 647 Waskom, M., Botvinnik, O., Hobson, P., Cole, J.B., Halchenko, Y., Hoyer, S., Miles, A.,  
648 Augspurger, T., Yarkoni, T., Megies, T., Coelho, L.P., Wehner, D., cynddl, Ziegler, E.,  
649 diego, Zaytsev, Y.V., Hoppe, T., Seabold, S., Cloud, P., Koskinen, M., Meyer, K., Qalieh,  
650 A., and Allan, D., 2014. seaborn: v0.5.0 (November 2014).
- 651 Wilkinson, D.L. and Harrison, R.G., 1991. Predicting the solubility of recombinant proteins in  
652 *Escherichia coli*. *Bio/technology* , 9 (5), 443–448.
- 653 Wu, Z., Kan, S.B.J., Lewis, R.D., Wittmann, B.J., and Arnold, F.H., 2019. Machine  
654 learning-assisted directed protein evolution with combinatorial libraries. *Proceedings of*  
655 *the National Academy of Sciences of the United States of America*, 116 (18),  
656 8852–8858.
- 657 Xiao, N., Cao, D.-S., Zhu, M.-F., and Xu, Q.-S., 2015. protr/ProtrWeb: R package and web  
658 server for generating various numerical representation schemes of protein sequences.  
659 *Bioinformatics* , 31 (11), 1857–1859.
- 660 Xiao, R., Anderson, S., Aramini, J., Belote, R., Buchwald, W.A., Ciccocanti, C., Conover, K.,  
661 Everett, J.K., Hamilton, K., Huang, Y.J., Janjua, H., Jiang, M., Kornhaber, G.J., Lee,  
662 D.Y., Locke, J.Y., Ma, L.-C., Maglaqui, M., Mao, L., Mitra, S., Patel, D., Rossi, P.,  
663 Sahdev, S., Sharma, S., Shastry, R., Swapna, G.V.T., Tong, S.N., Wang, D., Wang, H.,  
664 Zhao, L., Montelione, G.T., and Acton, T.B., 2010. The high-throughput protein sample  
665 production platform of the Northeast Structural Genomics Consortium. *Journal of*  
666 *structural biology*, 172 (1), 21–33.
- 667 Yang, K.K., Wu, Z., and Arnold, F.H., 2019. Machine-learning-guided directed evolution for  
668 protein engineering. *Nature methods*, 16 (8), 687–694.
- 669 Yin, H., Li, Y.-Z., and Li, M.-L., 2011. On the relation between residue flexibility and residue  
670 interactions in proteins. *Protein and peptide letters*, 18 (5), 450–456.
- 671 Yuan, Z., Bailey, T.L., and Teasdale, R.D., 2005. Prediction of protein B-factor profiles.  
672 *Proteins: Structure, Function, and Bioinformatics*.
