# 1 Solubility-Weighted Index: fast and accurate prediction of protein solubility

2  
3 Bikash K. Bhandari<sup>1</sup>, Paul P. Gardner<sup>1,2</sup>, Chun Shen Lim<sup>1,\*</sup>

4  
5 <sup>1</sup>Department of Biochemistry, School of Biomedical Sciences, University of Otago, Dunedin,  
6 New Zealand

7 <sup>2</sup>Biomolecular Interaction Centre, University of Canterbury, Christchurch, New Zealand

8  
9 \*Corresponding author. Email: [chunshen.lim@otago.ac.nz](mailto:chunshen.lim@otago.ac.nz)

## 10 11 12 ABSTRACT

13 **Motivation:** Recombinant protein production is a widely used technique in the biotechnology  
14 and biomedical industries, yet only a quarter of target proteins are soluble and can therefore  
15 be purified.

16 **Results:** We have discovered that global structural flexibility, which can be modeled by  
17 normalised B-factors, accurately predicts the solubility of 12,216 recombinant proteins  
18 expressed in *Escherichia coli*. We have optimised B-factors, and derived a new set of values  
19 for solubility scoring that further improves prediction accuracy. We call this new predictor the  
20 'Solubility-Weighted Index' (SWI). Importantly, SWI outperforms many existing protein  
21 solubility prediction tools. Furthermore, we have developed 'SoDoPE' (Soluble Domain for  
22 Protein Expression), a web interface that allows users to choose a protein region of interest  
23 for predicting and maximising both protein expression and solubility.

## 24 25 Availability

26 The SoDoPE web server and source code are freely available at <https://tisigner.com/sodope>  
27 and <https://github.com/Gardner-Binflab/TISIGNER-ReactJS>, respectively.

28 The code and data for reproducing our analysis can be found at  
29 [https://github.com/Gardner-Binflab/SoDoPE\\_paper\\_2020](https://github.com/Gardner-Binflab/SoDoPE_paper_2020).

## 30 31 32 33 INTRODUCTION

34 High levels of protein expression and solubility are two major requirements of successful  
35 recombinant protein production (Esposito and Chatterjee 2006). However, recombinant  
36 protein production is a challenging process. Almost half of recombinant proteins fail to be  
37 expressed and half of the successfully expressed proteins are insoluble  
38 (<http://targetdb.rcsb.org/metrics/>). These failures hamper protein research, with particular  
39 implications for structural, functional and pharmaceutical studies that require soluble and  
40 concentrated protein solutions (Kramer et al. 2012; Hou et al. 2018). Therefore, solubility  
41 prediction and protein engineering for enhanced solubility is an active area of research.  
42 Notable protein engineering approaches include mutagenesis, truncation (i.e., expression of  
43 partial protein sequences), or fusion with a solubility-enhancing tag (Waldo 2003; Esposito  
44 and Chatterjee 2006; Trevino, Martin Scholtz, and Nick Pace 2007; Chan et al. 2010; Kramer  
45 et al. 2012; Costa et al. 2014).

46

47 Protein solubility, at least in part, depends upon extrinsic factors such as ionic strength,  
48 temperature and pH, as well as intrinsic factors—the physicochemical properties of the  
49 protein sequence and structure, including molecular weight, amino acid composition,  
50 hydrophobicity, aromaticity, isoelectric point, structural propensities and the polarity of  
51 surface residues (Wilkinson and Harrison 1991; Chiti et al. 2003; Tartaglia et al. 2004; Diaz  
52 et al. 2010). Many solubility prediction tools have been developed around these features  
53 using statistical models (e.g., linear and logistic regression) or other machine learning  
54 models (e.g., support vector machines and neural networks) (Hirose and Noguchi 2013;  
55 Habibi et al. 2014; Hebditch et al. 2017; Sormanni et al. 2017; Heckmann et al. 2018; Z. Wu  
56 et al. 2019; Yang, Wu, and Arnold 2019).

57

58 In this study, we investigated the experimental outcomes of 12,216 recombinant proteins  
59 expressed in *Escherichia coli* from the ‘Protein Structure Initiative: Biology’ (PSI: Biology)  
60 (Chen et al. 2004; Acton et al. 2005). We showed that protein structural flexibility is more  
61 accurate than other protein sequence properties in predicting solubility (Craveur et al. 2015;  
62 M. Vihinen, Torkkila, and Riikonen 1994). Flexibility is a standard feature that appears to  
63 have been overlooked in previous solubility prediction attempts. On this basis, we derived a  
64 set of 20 values for the standard amino acid residues and used them to predict solubility. We  
65 call this new predictor the ‘Solubility-Weighted Index’ (SWI). SWI is a powerful predictor of  
66 solubility, and a good proxy for global structural flexibility. In addition, SWI outperforms many  
67 existing *de novo* protein solubility prediction tools.

68

69

70

## 71 RESULTS

### 72 Global structural flexibility performs well at predicting protein solubility

73 We sought to understand what makes a protein soluble, and develop a fast and accurate  
74 approach for solubility prediction. To determine which protein sequence properties accurately  
75 predict protein solubility, we analysed 12,216 target proteins from over 196 species that were  
76 expressed in *E. coli* (the PSI: Biology dataset; see Supplementary Fig S1 and Table S1A)  
77 (Chen et al. 2004; Acton et al. 2005). These proteins were expressed either with a  
78 C-terminal or N-terminal polyhistidine fusion tag (pET21\_NESG and pET15\_NESG  
79 expression vectors, N=8,780 and 3,436, respectively). They were previously curated and  
80 labeled as ‘Protein\_Soluble’ or ‘Tested\_Not\_Soluble’ (Seiler et al. 2014), based on the  
81 soluble analysis of cell lysate using SDS-PAGE (R. Xiao et al. 2010). A total of 8,238  
82 recombinant proteins were found to be soluble, in which 6,432 of them belong to the  
83 pET21\_NESG dataset. Both the expression system and solubility analysis method are  
84 commonly used (Costa et al. 2014). Therefore, this collection of data captures a broad range  
85 of protein solubility issues.

86

87 We evaluated nine standard and 9,920 miscellaneous protein sequence properties using the  
88 Biopython’s ProtParam module and ‘protr’ R package, respectively (Cock et al. 2009; N.  
89 Xiao et al. 2015). For example, the standard properties include the Grand Average of  
90 Hydropathy (GRAVY), secondary structure propensities, protein structural flexibility etc.,  
91 whereas miscellaneous properties include amino acid composition, autocorrelation, etc.

92 Strikingly, protein structural flexibility outperformed other features in solubility prediction  
 93 [Area Under the ROC Curve (AUC) = 0.67; Fig 1, Supplementary Fig S2 and Table S2].  
 94  
 95

96

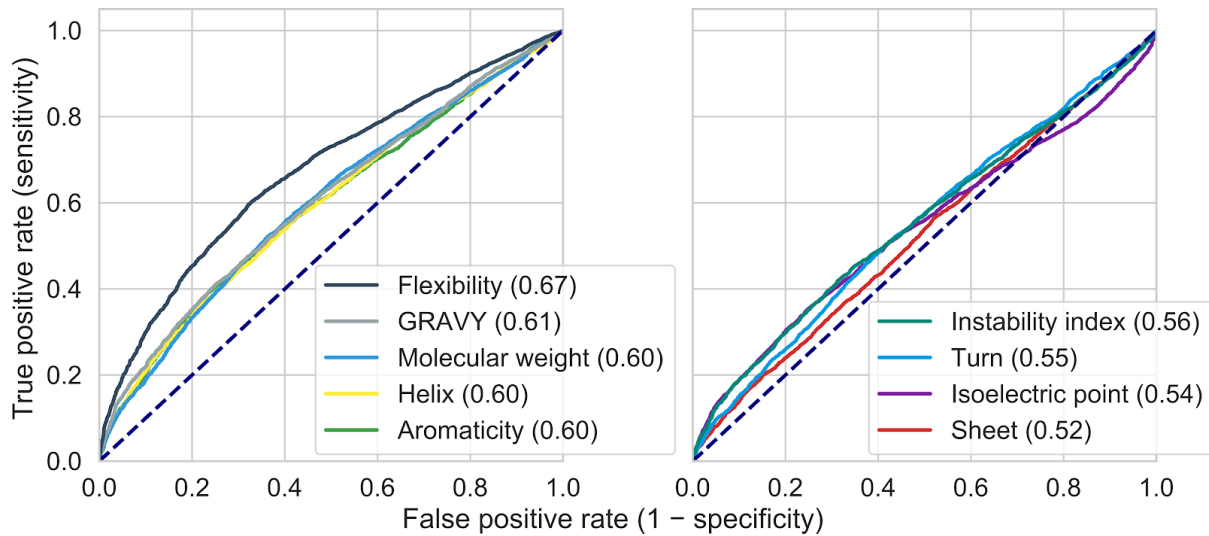

97

98 **Fig 1. Global structural flexibility outperforms the other standard protein sequence**  
 99 **properties in protein solubility prediction.** ROC analysis of the standard protein sequence  
 100 features for predicting the solubility of 12,216 recombinant proteins expressed in *E. coli* (the  
 101 PSI:Biology dataset). AUC scores (perfect = 1.00, random = 0.50) are shown in parentheses.  
 102 The ROC curves are shown in two separate panels for clarity. Dashed lines denote the  
 103 performance of random classifiers. See also Supplementary Fig S2 and Table S2. AUC,  
 104 Area Under the ROC Curve; GRAVY, Grand Average of Hydropathy; PSI:Biology, Protein  
 105 Structure Initiative:Biology; ROC, Receiver Operating Characteristic.

106

107

### 108 **The Solubility-Weighted Index (SWI) is an improved predictor of solubility**

109 Protein structural flexibility, in particular, the flexibility of local regions, is often associated  
 110 with function (Craveur et al. 2015). The calculation of flexibility is usually performed by  
 111 assigning a set of 20 normalised B-factors—a measure of vibration of C-alpha atoms (see  
 112 Supplementary Notes)—to a protein sequence and averaging the values by a sliding window  
 113 approach (Ragone et al. 1989; Karplus and Schulz 1985; M. Vihinen, Torkkila, and Riikonen  
 114 1994; Smith et al. 2003). We reasoned that such sliding window approach can be  
 115 approximated by a more straightforward arithmetic mean for calculating global structural  
 116 flexibility (see Supplementary Notes). We determined the correlation between flexibility  
 117 (Vihinen *et al.*'s sliding window approach as implemented in Biopython) and solubility scores  
 118 calculated as follows:

119

120

$$\frac{1}{L} \left( \sum_{i=1}^L B_i \right) \quad (1)$$

121

122 where  $B_i$  is the normalised B-factor of the amino acid residue at the position  $i$ , and  $L$  is the  
 123 sequence length. We obtained a strong correlation for the PSI:Biology dataset (Spearman's

124 rho = 0.98, P-value below machine's underflow level). Therefore, we reasoned that the  
125 sliding window approach is not necessary for our purpose.

126  
127 We applied this arithmetic mean approach (i.e., sequence composition scoring) to the  
128 PSI:Biology dataset and compared four sets of previously published, normalised B-factors  
129 (Bhaskaran and Ponnuswamy 1988; Ragone et al. 1989; M. Vihinen, Torkkila, and Riikonen  
130 1994; Smith et al. 2003) Among these sets of B-factors, sequence composition scoring using  
131 the most recently published set of normalised B-factors produced the highest AUC score  
132 (Supplementary Fig S3, AUC = 0.66).

133  
134 To improve the prediction accuracy of solubility, we iteratively refined the weights of amino  
135 acid residues using the Nelder-Mead optimisation algorithm (Nelder and Mead 1965). To  
136 avoid testing and training on similar sequences, we generated 10 cross-validation sets with a  
137 maximised heterogeneity between these subsets (i.e. no similar sequences between  
138 subsets). We first clustered all 12,216 PSI:Biology protein sequences using a 40% similarity  
139 threshold using USEARCH to produce 5,050 clusters with remote similarity (see Methods  
140 and Supplementary Fig S4). The clusters were grouped into 10 cross-validation sets of  
141 approximately 1,200 sequences each manually. We did not select a representative sequence  
142 for each cluster as about 12% of clusters contain a mix of soluble and insoluble proteins  
143 (Supplementary Fig S4C). More importantly, to address the issues of sequence similarity and  
144 imbalanced classes, we performed 1,000 bootstrap resamplings for each cross-validation  
145 step (Fig 2A and Supplementary Fig S5). We calculated the solubility scores using the  
146 optimised weights as Equation 1 and the AUC scores for each cross-validation step. Our  
147 training and test AUC scores were  $0.72 \pm 0.00$  and  $0.71 \pm 0.01$ , respectively, showing an  
148 improvement over flexibility in solubility prediction (mean  $\pm$  standard deviation; Fig 2B and  
149 Supplementary Table S3).

150  
151 The final weights were derived from the arithmetic means of the weights for individual amino  
152 acid residues obtained cross-validation (Supplementary Table S4). We observed over a 20%  
153 change on the weights for cysteine (C) and histidine (H) residues (Fig 2C and  
154 Supplementary Table S4). These results are in agreement with the contributions of cysteine  
155 and histidine residues as shown in Supplementary Fig S2B. We call the solubility score of a  
156 protein sequence calculated using the final weights the Solubility-Weighted Index (SWI).

157  
158

159

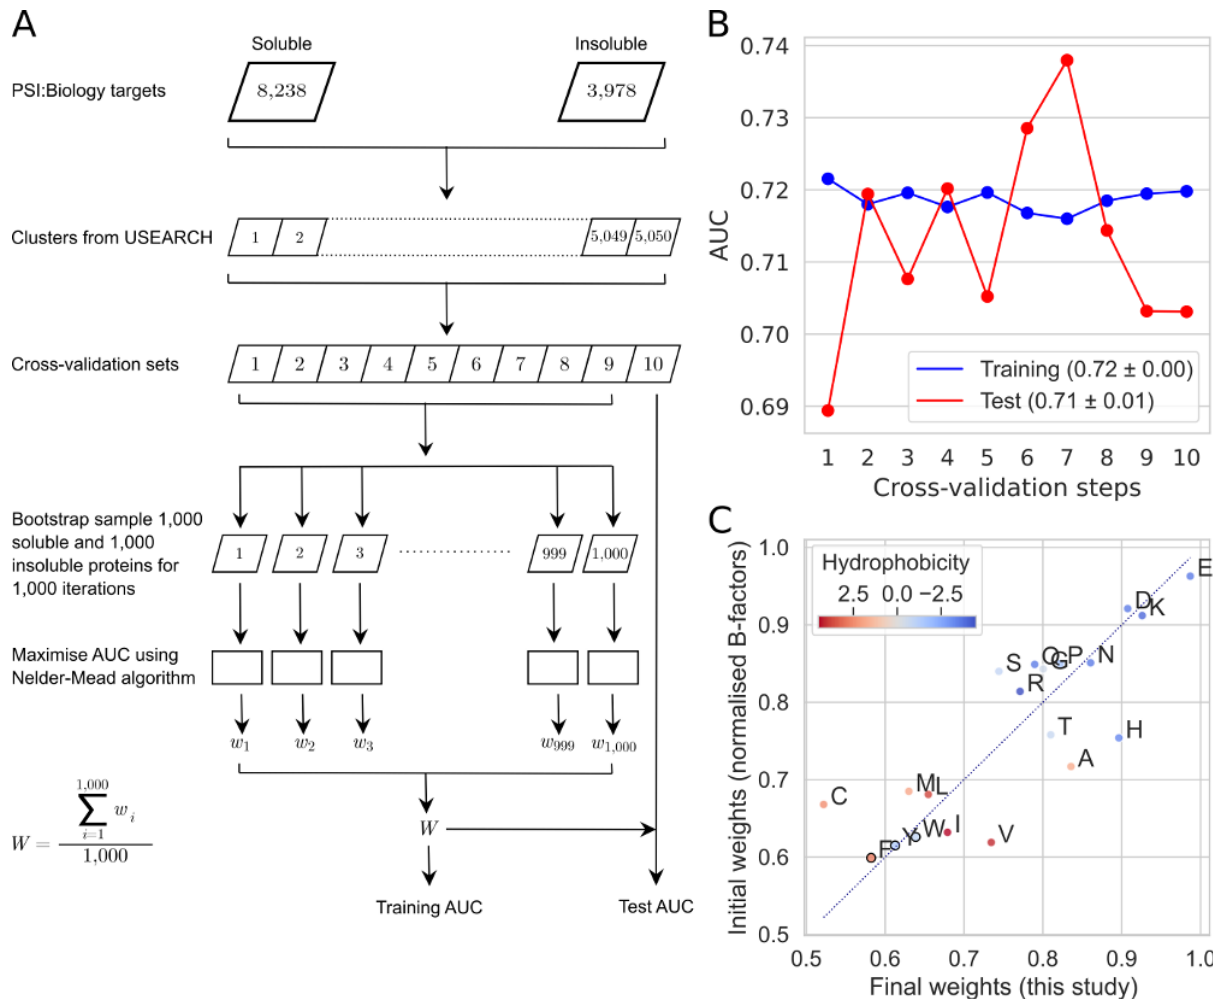

160

161 **Fig 2. Derivation of the Solubility-Weighted Index (SWI).** (A) Flow chart shows an  
 162 iterative refinement of the most recently published set of normalised B-factors for solubility  
 163 prediction (Smith et al. 2003). The solubility score of a protein sequence was calculated  
 164 using a sequence composition scoring approach (Equation 1, using optimised weights  $W$ ,  
 165 instead of normalised B-factors  $B$ ). These scores were used to compute the AUC scores for  
 166 training and test datasets. (B) Training and test performance of solubility prediction using  
 167 optimised weights for 20 amino acid residues in a 10-fold cross-validation (mean AUC ±  
 168 standard deviation). Related data and figures are available as Supplementary Table S3 and  
 169 Supplementary Fig S4 and S5. (C) Comparison between the 20 initial and final weights for  
 170 amino acid residues. The final weights are derived from the arithmetic mean of the optimised  
 171 weights from cross-validation. These weights are used to calculate SWI, the solubility score  
 172 of a protein sequence, in the subsequent analyses. Filled circles, which represent amino acid  
 173 residues, are colored by hydrophobicity (Kyte and Doolittle 1982). Solid black circles denote  
 174 aromatic amino acid residues phenylalanine (F), tyrosine (Y), tryptophan (W). Dotted  
 175 diagonal line represents no change in weight. See also Supplementary Table S4 and Fig S4.  
 176 AUC, Area Under the ROC Curve; ROC, Receiver Operating Characteristic;  $W$ , arithmetic  
 177 mean of the weights of an amino acid residue optimised from 1,000 bootstrap samples in a  
 178 cross-validation step.

179

180  
181  
182  
183  
184  
185  
186  
187  
188  
189  
190  
191  
192  
193  
194  
195  
196  
197  
198  
199  
200  
201

To validate the cross-validation results, we used a dataset independent of the PSI:BiologY data known as eSOL (Niwa et al. 2009). This dataset consists of the solubility percentages of *E. coli* proteins determined using an *E. coli* cell-free system (N = 3,198). Our solubility scoring using the final weights showed a significant improved correlation with *E. coli* protein solubility over the initial weights (Smith *et al.*'s normalised B-factors) [Spearman's rho of 0.50 ( $P = 9.46 \times 10^{-206}$ ) versus 0.40 ( $P = 4.57 \times 10^{-120}$ )]. We repeated the correlation analysis by removing extra amino acid residues including His-tags from the eSOL sequences (MRGSHHHHTDPALRA and GLCGR at the N- and C-termini, respectively). This artificial dataset was created based on the assumption that His-tags have little effect on solubility. We observed a slight decrease in correlation for this artificial dataset (Spearman's rho = 0.47,  $P = 3.67 \times 10^{-176}$ ), which may be due to the effects of His-tag in solubility and/or the limitation(s) of our approach that may overfit to His-tag fusion proteins.

We performed Spearman's correlation analysis for both the PSI:BiologY and eSOL datasets. SWI shows the strongest correlation with solubility compared to the standard and 9,920 protein sequence properties (Fig 3 and Supplementary Fig S2, respectively). SWI also strongly correlates with flexibility, suggesting that SWI is also a good proxy for global structural flexibility.

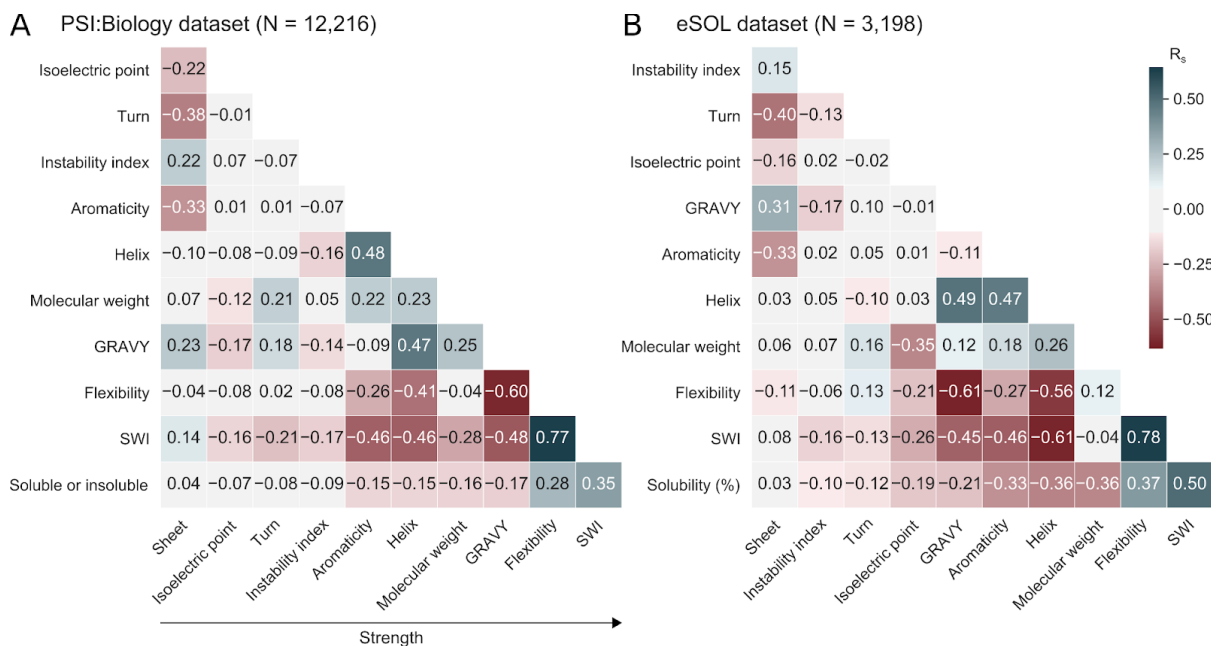

202  
203  
204  
205  
206  
207  
208  
209  
210

**Fig 3. SWI strongly correlates with solubility.** (A) Correlation matrix plot of the solubility of recombinant proteins expressed in *E. coli* and their standard protein sequence properties and SWI. These recombinant proteins are the PSI:BiologY targets (N = 12,216) with a binary solubility status of 'Protein\_Soluble' or 'Tested\_Not\_Soluble'. Related data is available as Supplementary Table S5. (B) Correlation matrix plot of the solubility percentages of *E. coli* proteins and their standard protein sequence properties and SWI. The solubility percentages were previously determined using an *E. coli* cell-free system (eSOL, N = 3,198). Related data is available as Supplementary Table S6. GRAVY, Grand Average of Hydropathy;

211 PSI:Biography, Protein Structure Initiative:Biography;  $R_s$ , Spearman's rho; SWI,  
212 Solubility-Weighted Index.

213  
214

215 We asked whether protein solubility can be predicted by surface amino acid residues. To  
216 address this question, we examined a previously published dataset for the protein surface  
217 'stickiness' of 397 *E. coli* proteins (Levy, De, and Teichmann 2012). This dataset has the  
218 annotation for surface residues based on previously solved protein crystal structures. We  
219 observed little correlation between the protein surface 'stickiness' and the solubility data from  
220 eSOL (Spearman's rho = 0.05,  $P = 0.34$ ,  $N = 348$ ; Supplementary Fig S6A). Next, we  
221 evaluated if amino acid composition scoring using surface residues is sufficient, optimising  
222 only the weights of surface residues should achieve similar or better results than SWI. As  
223 above, we iteratively refined the weights of surface residues using the Nelder-Mead  
224 optimisation algorithm. The method was initialised with Smith *et al.*'s normalised B-factors  
225 and a maximised correlation coefficient was the target. However, a low correlation was  
226 obtained upon convergence (Spearman's rho = 0.18,  $P = 7.20 \times 10^{-4}$ ; Supplementary Fig  
227 S6B). In contrast, the SWI of the full-length sequences has a much stronger correlation with  
228 solubility (Spearman's rho = 0.46,  $P = 2.97 \times 10^{-19}$ ; Supplementary Fig S6C). These results  
229 suggest that the full-length of sequences contributes to protein solubility, not just surface  
230 residues, in which solubility is modulated by cotranslational folding (Natan *et al.* 2018).

231

232 To understand the properties of soluble and insoluble proteins, we determined the  
233 enrichment of amino acid residues in the PSI:Biography targets relative to the eSOL sequences  
234 (see Methods). We observed that the PSI:Biography targets are enriched in charged residues  
235 lysine (K), glutamate (E) and aspartate (D), and depleted in aromatic residues tryptophan  
236 (W), albeit to a lesser extent for insoluble proteins (Supplementary Fig S7A). As expected,  
237 cysteine residues (C) are enriched in the PSI:Biography insoluble proteins, supporting previous  
238 findings that cysteine residues contribute to poor solubility in the *E. coli* expression system  
239 (Diaz *et al.* 2010; Wilkinson and Harrison 1991).

240

241 In addition, we compared the SWI of random sequences with the PSI:Biography and eSOL  
242 sequences. We included an analysis of random sequences to confirm whether SWI can  
243 distinguish between biological and random sequences. We found that the SWI scores of  
244 soluble proteins are higher than those of insoluble proteins (Supplementary Fig S7B), and  
245 that true biological sequences also tend to have higher SWI scores than random sequences,  
246 highlighting a potential evolutionary selection for solubility.

247

248

### 249 **SWI outperforms many protein solubility prediction tools**

250 To confirm the usefulness of SWI in solubility prediction, we compared it with the existing  
251 tools Protein-Sol (Hebditch *et al.* 2017), CamSol v2.1 (Sormanni, Aprile, and Vendruscolo  
252 2015; Sormanni *et al.* 2017), PaRSnIP (Rawi *et al.* 2018), DeepSol v0.3 (Khurana *et al.*  
253 2018), the Wilkinson-Harrison model (Davis *et al.* 1999; Harrison 2000; Wilkinson and  
254 Harrison 1991), and ccSOL omics (Agostini *et al.* 2014). We did not include the specialised  
255 tools that model protein structural information such as surface geometry, surface charges  
256 and solvent accessibility because these tools require prior knowledge of protein tertiary

257 structure. For example, Aggrescan3D and SOLart accept only PDB files that can be  
 258 downloaded from the Protein Data Bank or produced using a homology modeling program  
 259 (Kuriata et al. 2019; Hou et al. 2019). SWI outperforms other tools except for Protein-Sol in  
 260 predicting *E. coli* protein solubility (Table 1, Fig 4A). Our SWI C program is also the fastest  
 261 solubility prediction algorithm (Table 1, Fig 4B and Supplementary Table S7).

262  
 263  
 264

**Table 1.** Comparison of protein solubility prediction methods and software.

|             | Approaches                                                                                                                                                                                                                                                                                                                                                                                                                                                                                                                                                                    | Features      | Wall time <sup>a</sup><br>(s per sequence) | PSI:Biolog <sup>b</sup><br>(AUC) | eSOL<br>[R <sub>s</sub> (P-value)]               |
|-------------|-------------------------------------------------------------------------------------------------------------------------------------------------------------------------------------------------------------------------------------------------------------------------------------------------------------------------------------------------------------------------------------------------------------------------------------------------------------------------------------------------------------------------------------------------------------------------------|---------------|--------------------------------------------|----------------------------------|--------------------------------------------------|
| SWI         | <ul style="list-style-type: none"> <li>Arithmetic mean (this study).</li> <li>A set of 20 values for amino acid residues derived from Smith <i>et al.</i>'s normalised B-factors (Smith et al. 2003) by the Nelder-Mead simplex algorithm.</li> <li>Trained and tested using the PSI:Biolog dataset curated by DNASU (Seiler et al. 2014).</li> <li>Available at <a href="https://tisigner.com/sodope">https://tisigner.com/sodope</a> and <a href="https://github.com/Gardner-BinfLab/SoDoPE_paper_2020">https://github.com/Gardner-BinfLab/SoDoPE_paper_2020</a></li> </ul> | 1             | <b>0.00 ± 0.00</b>                         | <b>0.71 ± 0.01</b>               | 0.50<br>(2.51 × 10 <sup>-205</sup> )             |
| Protein-Sol | <ul style="list-style-type: none"> <li>Linear model (Hebditch et al. 2017).</li> <li>Trained and tested using eSOL dataset (Niwa et al. 2009).</li> <li>Available at <a href="https://protein-sol.manchester.ac.uk">https://protein-sol.manchester.ac.uk</a></li> </ul>                                                                                                                                                                                                                                                                                                       | 10            | 1.16 ± 0.75                                | 0.68 ± 0.02                      | <b>0.54</b><br>(2.37 × 10 <sup>-240</sup> )      |
| Flexibility | <ul style="list-style-type: none"> <li>A sliding window of 9 amino acid residues (M. Vihinen, Torkkila, and Riikonen 1994).</li> <li>Vihinen <i>et al.</i>'s normalised B-factors derived from PDB.</li> <li>Available at <a href="https://github.com/biopython/biopython">https://github.com/biopython/biopython</a></li> </ul>                                                                                                                                                                                                                                              | 1             | 0.38 ± 0.04                                | 0.67 ± 0.02                      | 0.37<br>(7.73 × 10 <sup>-106</sup> )             |
| DeepSol S2  | <ul style="list-style-type: none"> <li>Neural network models (Khurana et al. 2018).</li> </ul>                                                                                                                                                                                                                                                                                                                                                                                                                                                                                | 57 (11 types) | 2069.77 ± 1613.63                          | 0.67 <sup>d</sup> ± 0.02         | 0.23<br>(5.82 × 10 <sup>-41</sup> ) <sup>c</sup> |



|                             |                                                                                                                                                                                                                                                                                                                                                                                                |                  |                   |                          |                                                |
|-----------------------------|------------------------------------------------------------------------------------------------------------------------------------------------------------------------------------------------------------------------------------------------------------------------------------------------------------------------------------------------------------------------------------------------|------------------|-------------------|--------------------------|------------------------------------------------|
|                             | <ul style="list-style-type: none"> <li>Trained and tested using a PSI: Biology dataset curated by ccSOL omics.</li> <li>Available at <a href="https://github.com/sameerkhurana10/DSOL_rv0.2">https://github.com/sameerkhurana10/DSOL_rv0.2</a></li> </ul>                                                                                                                                      |                  |                   |                          |                                                |
| DeepSol S3                  |                                                                                                                                                                                                                                                                                                                                                                                                |                  | 2075.93 ± 1613.80 | 0.66 <sup>d</sup> ± 0.02 | 0.35 (7.48 × 10 <sup>-91</sup> ) <sup>c</sup>  |
| DeepSol S1                  |                                                                                                                                                                                                                                                                                                                                                                                                |                  | 2081.93 ± 1612.71 | 0.64 <sup>d</sup> ± 0.03 | 0.39 (9.52 × 10 <sup>-116</sup> ) <sup>c</sup> |
| CamSol intrinsic web server | <ul style="list-style-type: none"> <li>Linear and logistic regression models (Sormanni, Aprile, and Vendruscolo 2015; Sormanni et al. 2017).</li> <li>Trained and tested using previously published datasets (Família et al. 2015).</li> <li>Available at <a href="http://www-vendruscolo.ch.cam.ac.uk/camsolmethod.html">http://www-vendruscolo.ch.cam.ac.uk/camsolmethod.html</a></li> </ul> | 4                | NA                | 0.66 ± 0.01              | 0.44 (4.53 × 10 <sup>-148</sup> )              |
| PaRSnIP                     | <ul style="list-style-type: none"> <li>Gradient boosting machine model (Rawi et al. 2018).</li> <li>Trained and tested using a PSI: Biology dataset curated by ccSOL omics.</li> <li>Available at <a href="https://github.com/RedaRawi/PaRSnIP">https://github.com/RedaRawi/PaRSnIP</a></li> </ul>                                                                                             | 8,477 (14 types) | 2055.50 ± 1621.11 | 0.61 ± 0.02              | 0.29 (3.57 × 10 <sup>-65</sup> )               |
| Wilkinson-Harrison model    | <ul style="list-style-type: none"> <li>Linear model using charge average and turn-forming residue fraction (Davis et al. 1999; Harrison 2000; Wilkinson and Harrison 1991).</li> <li>Available at <a href="https://github.com/brunoV/bio-tools-solubility-wilkinson">https://github.com/brunoV/bio-tools-solubility-wilkinson</a></li> </ul>                                                   | 2                | 0.09 ± 0.00       | 0.55 ± 0.03              | -0.06 (1.16 × 10 <sup>-4</sup> )               |
| ccSOL omics web server      | <ul style="list-style-type: none"> <li>Support vector machine model (Agostini et al. 2014).</li> <li>Trained and tested using a PSI: Biology dataset curated in-house.</li> <li>Available at <a href="http://s.tartaglialab.com/new_submission/ccsol_omics_file">http://s.tartaglialab.com/new_submission/ccsol_omics_file</a></li> </ul>                                                      | 5                | NA                | 0.51 ± 0.01              | -0.02 (0.18)                                   |

265 **Boldface values are the best results.**

266 <sup>a</sup>The wall time was reported at the level of machine precision (mean seconds  $\pm$  standard  
267 deviation). A total of 10 sequences were chosen from the PSI:Biological and eSOL datasets,  
268 related to Fig 4B and Supplementary Table S7 (see Methods).  
269 <sup>b</sup>For SWI, mean AUC  $\pm$  standard deviation was calculated from a 10-fold cross-validation (see  
270 Methods). For other tools, no cross-validations were done as the AUC scores were  
271 calculated directly from the individual subsets used for cross-validation.  
272 <sup>c</sup>DeepSol reports solubility prediction as probability and binary classes. The probability of  
273 solubility was used to calculate AUC and Spearman's correlation due to better results.  
274 AUC, Area Under the ROC Curve; NA, not applicable; PDB, Protein Data Bank; PSI:Biological,  
275 Protein Structure Initiative:Biological; ROC, Receiver Operating Characteristic;  $R_s$ , Spearman's  
276 rho; SWI, Solubility-Weighted Index; s, seconds.

277  
278  
279  
280

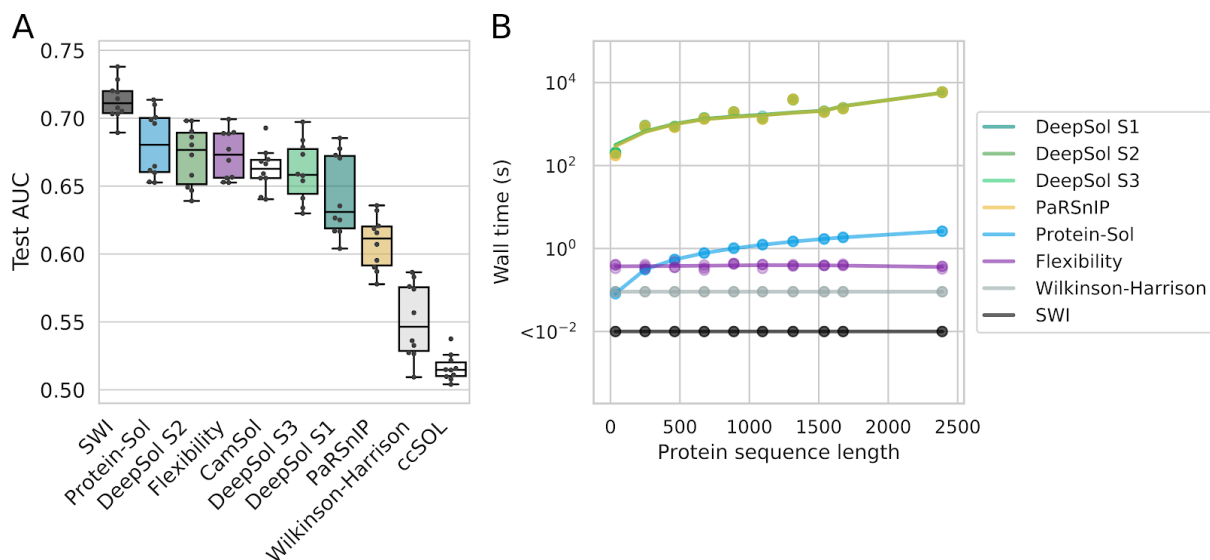

281  
282 **Fig 4. SWI outperforms existing protein solubility prediction tools. (A)** Prediction  
283 accuracy of solubility prediction tools using the above cross-validation sets (Fig 2A). For  
284 SWI, the test AUC scores were calculated from a 10-fold cross-validation (i.e., a boxplot  
285 representation of Fig 2B). For other tools, the test AUC scores were calculated directly from  
286 the individual subsets used for cross-validation. No cross-validations were done. CamSol  
287 and ccSOL omics are only available as web servers (no fill colors). **(B)** Wall time of protein  
288 solubility prediction tools per sequence (log scale). All command line tools were run three  
289 times using 10 sequences selected from the PSI:Biological and eSOL datasets. Related data is  
290 available as Supplementary Table S7. AUC, Area Under the ROC Curve; PSI:Biological,  
291 Protein Structure Initiative:Biological; ROC, Receiver Operating Characteristic; SWI,  
292 Solubility-Weighted Index; s, seconds.

293  
294

295 To demonstrate a use case for SWI, we developed the Soluble Domain for Protein  
296 Expression (SoDoPE) web server (see Methods and <https://tisigner.com/sodope>). Upon  
297 sequence submission, the SoDoPE web server enables users to navigate the protein  
298 sequence and its domains for predicting and maximising protein expression and solubility.

## 299 DISCUSSION

300 Protein structural flexibility has been associated with conformational variations, functions, thermal  
301 stability, ligand binding and disordered regions (Mauno Vihinen 1987; Teague 2003; Ma  
302 2005; Radivojac 2004; Schlessinger and Rost 2005; Yuan, Bailey, and Teasdale 2005; Yin,  
303 Li, and Li 2011). However, the use of flexibility in solubility prediction has been overlooked  
304 although their relationship has previously been noted (Tsumoto et al. 2003). In this study, we  
305 have shown that flexibility strongly correlates with solubility (Fig 3). Based on the normalised  
306 B-factors used to compute flexibility, we have derived a new position and length independent  
307 weights to score the solubility of a given protein sequence (i.e., sequence composition based  
308 score). We call this protein solubility score as SWI.

309  
310 Upon further inspection, we observe some interesting properties in SWI. SWI anti-correlates  
311 with helix propensity, GRAVY, aromaticity and isoelectric point (Fig 2C and 3), suggesting  
312 that SWI incorporates the key propensities affecting solubility. Amino acid residues with a  
313 lower aromaticity or hydrophilic are known to improve protein solubility (Trevino, Martin  
314 Scholtz, and Nick Pace 2007; Niwa et al. 2009; Kramer et al. 2012; Warwicker, Charonis,  
315 and Curtis 2014; Han et al. 2019; Wilkinson and Harrison 1991). Consistent with previous  
316 studies, the charged residues aspartate (D), glutamate (E) and lysine (K) are associated with  
317 high solubility, whereas the aromatic residues phenylalanine (F), tryptophan (W) and tyrosine  
318 (Y) are associated with low solubility (Fig 2C and Supplementary Fig S7A). Cysteine residue  
319 (C) has the lowest weight probably because disulfide bonds couldn't be properly formed in  
320 the *E. coli* expression hosts (Stewart, Aslund, and Beckwith 1998; Rosano and Ceccarelli  
321 2014; Jia and Jeon 2016; Aslund and Beckwith 1999). The weights are likely different if the  
322 solubility analysis was done using the reductase-deficient, *E. coli* Origami host strains, or  
323 eukaryotic hosts.

324  
325 Higher helix propensity has been reported to increase solubility (Idicula-Thomas and Balaji  
326 2005; Huang et al. 2012). However, our analysis has shown that helical and turn  
327 propensities anti-correlate with solubility, whereas sheet propensity lacks correlation with  
328 solubility, suggesting that disordered regions may tend to be more soluble (Fig 3). In  
329 accordance with these, SWI has stronger negative correlations with helix and turn  
330 propensities. These findings also suggest that protein solubility can be largely explained by  
331 overall amino acid composition, not just the surface amino acid residues. This idea aligns  
332 with our understanding that protein solubility and folding are closely linked, and folding  
333 occurs cotranscriptionally, a complex process that is driven various intrinsic and extrinsic  
334 factors (Wilkinson and Harrison 1991; Chiti et al. 2003; Tartaglia et al. 2004; Diaz et al.  
335 2010). However, it is unclear why sheet propensity has little contribution to solubility because  
336  $\beta$ -sheets have been shown to link closely with protein aggregation (Idicula-Thomas and  
337 Balaji 2005).

338  
339 We conclude that SWI is a well-balanced index that is derived from a simple sequence  
340 composition scoring method. To demonstrate the usefulness of SWI, we developed a web  
341 server called SoDoPE (Soluble Domain for Protein Expression; <https://tisigner.com/sodope>).  
342 SoDoPE calculates the probability of solubility of a user-selected region based on SWI,  
343 which can either be a full-length or a partial sequence (see Methods and Supplementary  
344 Table S8). This implementation is based on our observation that some protein domains tend

345 to be more soluble than the others. To demonstrate this point, we have analysed three  
346 commercial monoclonal antibodies and the severe acute respiratory syndrome coronavirus  
347 proteomes (SARS-CoV and SARS-CoV-2) (Wang et al. 2009; Marra et al. 2003; F. Wu et al.  
348 2020) (Supplementary Fig S8 and S9). These soluble domains may enhance protein  
349 solubility as a whole. SoDoPE also provides options for solubility prediction at the presence  
350 of solubility fusion tags. Similarly, solubility tags may act as soluble ‘protein domains’ that  
351 can outweigh the aggregation propensity of insoluble proteins. However, some soluble fusion  
352 proteins may become insoluble after proteolytic cleavage of solubility tags (Lebendiker and  
353 Danieli 2014). In addition, SoDoPE is integrated with TIsigner, a gene optimisation web  
354 service for protein expression. This pipeline provides a holistic approach to improve the  
355 outcome of recombinant protein expression.

356  
357  
358

## 359 **METHODS**

### 360 **Protein sequence properties**

361 The standard protein sequence properties were calculated using the Bio.SeqUtils.ProtParam  
362 module of Biopython v1.73 (Cock et al. 2009). All miscellaneous protein sequence properties  
363 were computed using the R package protr v1.6-2 (N. Xiao et al. 2015).

364  
365

### 366 **Protein solubility prediction**

367 We used the standard and miscellaneous protein sequence properties to predict the  
368 solubility of the PSI:Biology and eSOL targets (N=12,216 and 3,198, respectively) (Seiler et  
369 al. 2014; Niwa et al. 2009). For method comparison, we chose the protein solubility  
370 prediction tools that are scalable (Table 1). Default configurations were used for running the  
371 command line tools.

372

373 To benchmark the wall time of solubility prediction tools, we selected 10 sequences that span  
374 a large range of lengths from the PSI:Biology and eSOL datasets (from 36 to 2389 residues).  
375 All the tools were run and timed using a single process without using GPUs on a high  
376 performance computer [`/usr/bin/time -f '%E' <command>`; CentOS Linux 7 (Core)  
377 operating system, 72 cores in 2× Broadwell nodes (E5-2695v4, 2.1 GHz, dual socket 18  
378 cores per socket), 528 GiB memory]. Single sequence fasta files were used as input files.

379  
380

### 381 **SWI**

382 To improve protein solubility prediction, we optimised the most recently published set of  
383 normalised B-factors using the PSI:Biology dataset (Smith et al. 2003) (Fig 2). To avoid  
384 including homologous sequences in the test and training sets, we clustered the PSI:Biology  
385 targets using USEARCH v11.0.667, 32-bit (Edgar 2010). His-tag sequences were removed  
386 from all sequences before clustering to avoid false cluster inclusions. We obtained 5,050  
387 clusters using the parameters: `-cluster_fast <input_file> -id 0.4 -msaout`  
388 `<output_file> -threads 4`. These clusters were divided into 10 subsets with  
389 approximately 1,200 sequences per subsets manually. The subsequent steps were done  
390 with His-tag sequences. We used Smith *et al.*'s normalised B-factors as the initial weights to

391 maximise AUC using these 10 subsets with a 10-fold cross-validation. Since AUC is  
392 non-differentiable, we used the Nelder-Mead optimisation method (implemented in SciPy  
393 v1.2.0), which is a derivative-free, heuristic, simplex-based optimisation (Oliphant 2007;  
394 Millman and Aivazis 2011; Nelder and Mead 1965). For each step in cross-validation, we  
395 used 1,000 bootstrap resamplings containing 1,000 soluble and 1,000 insoluble proteins.  
396 Optimisation was carried out for each sample, giving 1,000 sets of weights. The arithmetic  
397 mean of these weights was used to determine the training and test AUC for the  
398 cross-validation step (Fig 2A).

399  
400

### 401 **Bit score**

402 To examine the enrichment of amino acid residues in soluble and insoluble proteins, we  
403 compute the bit scores for each amino acid residue in the PSI:Biological soluble and insoluble  
404 groups (Supplementary Fig S7A), we normalised the count of each residue ( $x$ ) in each  
405 group by the total number of residues in that group. We used the normalised count of amino  
406 acid residues using the eSOL *E. coli* sequences as the background. The bit score of residue  
407 ( $x$ ) for soluble or insoluble group is then given by the following equation:

408  
409

$$\text{bit score}(x)_i = \log_2 \left( \frac{f_i(x)}{f_{\text{eSOL}}(x)} \right), i = [\text{soluble}, \text{insoluble}] \quad (2)$$

410  
411  
412

where  $f_i(x)$  is the normalised count of residue ( $x$ ) in the PSI:Biological soluble or insoluble  
group and  $f_{\text{eSOL}}(x)$  is the normalised count in the eSOL sequences.

413  
414  
415  
416  
417

For a control, random protein sequences were generated by incrementing the length of  
sequence, starting from a length of 50 residues to 6,000 residues with a step size of 50  
residues. A hundred random sequences were generated for each length, giving a total of  
12,000 unique random sequences.

418  
419

### 420 **The SoDoPE web server**

421 To estimate the probability of solubility using SWI, we fitted the following logistic regression  
422 to the PSI:Biological dataset:

423  
424

$$\text{probability of solubility} = 1/(1 + \exp(-(ax + b))) \quad (3)$$

425  
426  
427  
428  
429

where,  $x$  is the SWI of a given protein sequence,  $a = 81.05812$  and  $b = -62.7775$ . The  
P-value of log-likelihood ratio test was less than machine precision. Equation 3 can be used  
to predict the solubility of a protein sequence given that the protein is successfully expressed  
in *E. coli* (Supplementary Table S8).

430  
431  
432  
433  
434  
435

On this basis, we developed a solubility prediction webservice called the Soluble Domain for  
Protein Expression (SoDoPE). Our web server accepts either a nucleotide or amino acid  
sequence. Upon sequence submission, a query is sent to the HMMER web server to  
annotate protein domains (<https://www.ebi.ac.uk/Tools/hmmer/>) (Potter et al. 2018). Once the  
protein domains are identified, users can choose a domain or any custom region (including

436 full-length sequence) to examine the probability of solubility, flexibility and GRAVY. This  
437 functionality enables protein biochemists to plan their experiments and opt for the domains  
438 or regions with high probability of solubility. Furthermore, we implemented a simulated  
439 annealing algorithm that maximised the probability of solubility for a given region by  
440 generating a list of regions with extended boundaries. Users can also predict the  
441 improvement in solubility by selecting a commonly used solubility tag or a custom tag.

442  
443 We linked SoDoPE with TIsigner, which is our existing web server for maximising the  
444 accessibility of translation initiation sites (Bhandari, Lim, and Gardner 2019). This pipeline  
445 allows users to predict and optimise both protein expression and solubility for a gene of  
446 interest. The SoDoPE web server is freely available at <https://tisigner.com/sodope>.

447  
448

### 449 **Statistical analysis**

450 Data analysis was done using Pandas v0.25.3 (McKinney 2010), scikit-learn v0.20.2  
451 (Pedregosa et al. 2011), numpy v1.16.2 (van der Walt, Colbert, and Varoquaux 2011) and  
452 statsmodel v0.10.1 (Seabold and Perktold 2010). Plots were generated using Matplotlib  
453 v3.0.2 (Caswell et al. 2018) and Seaborn v0.9.0 (Waskom et al. 2014).

454  
455

### 456 **Code and data availability**

457 Jupyter notebook of our analysis can be found at  
458 [https://github.com/Gardner-Binflab/SoDoPE\\_paper\\_2020](https://github.com/Gardner-Binflab/SoDoPE_paper_2020). The source code for our solubility  
459 prediction server (SoDoPE) can be found at  
460 <https://github.com/Gardner-Binflab/TISIGNER-ReactJS>.

461  
462  
463

### 464 **ACKNOWLEDGEMENTS**

465 We thank New Zealand eScience Infrastructure for providing a high performance computing  
466 platform. We are grateful to Harry Biggs for proofreading our manuscript and providing  
467 feedback for the web server. This work was supported by the Ministry of Business,  
468 Innovation and Employment, New Zealand (MBIE grant: UOOX1709).

469  
470  
471

### 472 **AUTHOR CONTRIBUTIONS**

473 C.S.L. conceived the work; B.K.B. and C.S.L. analysed the data and C.S.L. contributed  
474 flexibility analysis; B.K.B. and P.P.G. formulated SWI; B.K.B. developed the SoDoPE web  
475 server; B.K.B., P.P.G. and C.S.L. wrote the manuscript.

476  
477  
478

### 479 **COMPETING INTERESTS**

480 The authors declare no competing interests.

481

## 482 REFERENCES

483

- 484 Acton, Thomas B., Kristin C. Gunsalus, Rong Xiao, Li Chung Ma, James Aramini, Michael C.  
485 Baran, Yi-Wen Chiang, et al. 2005. "Robotic Cloning and Protein Production Platform of  
486 the Northeast Structural Genomics Consortium." *Methods in Enzymology* 394: 210–43.
- 487 Agostini, Federico, Davide Cirillo, Carmen Maria Livi, Riccardo Delli Ponti, and Gian  
488 Gaetano Tartaglia. 2014. "ccSQL Omics: A Webserver for Solubility Prediction of  
489 Endogenous and Heterologous Expression in Escherichia Coli." *Bioinformatics* 30 (20):  
2975–77.
- 490 Aslund, F., and J. Beckwith. 1999. "The Thioredoxin Superfamily: Redundancy, Specificity,  
491 and Gray-Area Genomics." *Journal of Bacteriology* 181 (5): 1375–79.
- 492 Bhandari, Bikash K., Chun Shen Lim, and Paul P. Gardner. 2019. "Highly Accessible  
493 Translation Initiation Sites Are Predictive of Successful Heterologous Protein  
494 Expression." *bioRxiv*. <https://doi.org/10.1101/726752>.
- 495 Bhaskaran, R., and P. K. Ponnuswamy. 1988. "Positional Flexibilities of Amino Acid  
496 Residues in Globular Proteins." *International Journal of Peptide and Protein Research*.  
497 <https://doi.org/10.1111/j.1399-3011.1988.tb01258.x>.
- 498 Caswell, Thomas A., Michael Droettboom, John Hunter, Eric Firing, Antony Lee, David  
499 Stansby, Elliott Sales de Andrade, et al. 2018. *Matplotlib/matplotlib v3.0.2* (version  
500 3.0.2). <https://doi.org/10.5281/zenodo.1482099>.
- 501 Chan, Wen-Ching, Po-Huang Liang, Yan-Ping Shih, Ueng-Cheng Yang, Wen-Chang Lin, and  
502 Chun-Nan Hsu. 2010. "Learning to Predict Expression Efficacy of Vectors in  
503 Recombinant Protein Production." *BMC Bioinformatics* 11 Suppl 1 (January): S21.
- 504 Chen, Li, Rose Oughtred, Helen M. Berman, and John Westbrook. 2004. "TargetDB: A  
505 Target Registration Database for Structural Genomics Projects." *Bioinformatics* 20 (16):  
506 2860–62.
- 507 Chiti, Fabrizio, Massimo Stefani, Niccolò Taddei, Giampietro Ramponi, and Christopher M.  
508 Dobson. 2003. "Rationalization of the Effects of Mutations on Peptide and Protein  
509 Aggregation Rates." *Nature* 424 (6950): 805–8.
- 510 Cock, Peter J. A., Tiago Antao, Jeffrey T. Chang, Brad A. Chapman, Cymon J. Cox, Andrew  
511 Dalke, Iddo Friedberg, et al. 2009. "Biopython: Freely Available Python Tools for  
512 Computational Molecular Biology and Bioinformatics." *Bioinformatics* 25 (11): 1422–23.
- 513 Costa, Sofia, André Almeida, António Castro, and Lucília Domingues. 2014. "Fusion Tags for  
514 Protein Solubility, Purification and Immunogenicity in Escherichia Coli: The Novel Fh8  
515 System." *Frontiers in Microbiology* 5 (February): 63.
- 516 Craveur, Pierrick, Agnel P. Joseph, Jeremy Esque, Tarun J. Narwani, Floriane Noël, Nicolas  
517 Shinada, Matthieu Goguet, et al. 2015. "Protein Flexibility in the Light of Structural  
518 Alphabets." *Frontiers in Molecular Biosciences* 2 (May): 20.
- 519 Davis, G. D., C. Elisee, D. M. Newham, and R. G. Harrison. 1999. "New Fusion Protein  
520 Systems Designed to Give Soluble Expression in Escherichia Coli." *Biotechnology and  
521 Bioengineering* 65 (4): 382–88.
- 522 Diaz, Armando A., Emanuele Tomba, Reese Lennarson, Rex Richard, Miguel J. Bagajewicz,  
523 and Roger G. Harrison. 2010. "Prediction of Protein Solubility in Escherichia Coli Using  
524 Logistic Regression." *Biotechnology and Bioengineering* 105 (2): 374–83.
- 525 Edgar, Robert C. 2010. "Search and Clustering Orders of Magnitude Faster than BLAST."  
526 *Bioinformatics* 26 (19): 2460–61.
- 527 Esposito, Dominic, and Deb K. Chatterjee. 2006. "Enhancement of Soluble Protein  
528 Expression through the Use of Fusion Tags." *Current Opinion in Biotechnology* 17 (4):  
529 353–58.
- 530 Família, Carlos, Sarah R. Dennison, Alexandre Quintas, and David A. Phoenix. 2015.  
531 "Prediction of Peptide and Protein Propensity for Amyloid Formation." *PloS One* 10 (8):

- 532 e0134679.
- 533 Habibi, Narjeskhatoon, Siti Z. Mohd Hashim, Alireza Norouzi, and Mohammed Razip  
534 Samian. 2014. "A Review of Machine Learning Methods to Predict the Solubility of  
535 Overexpressed Recombinant Proteins in Escherichia Coli." *BMC Bioinformatics* 15  
536 (May): 134.
- 537 Han, Xi, Wenbo Ning, Xiaoqiang Ma, Xiaonan Wang, and Kang Zhou. 2019. "Improve  
538 Protein Solubility and Activity Based on Machine Learning Models." *bioRxiv*.  
539 <https://doi.org/10.1101/817890>.
- 540 Harrison, R. G. 2000. "Expression of Soluble Heterologous Proteins via Fusion with NusA  
541 Protein." *Innovations* 11: 4–7.
- 542 Hebditch, Max, M. Alejandro Carballo-Amador, Spyros Charonis, Robin Curtis, and Jim  
543 Warwicker. 2017. "Protein-Sol: A Web Tool for Predicting Protein Solubility from  
544 Sequence." *Bioinformatics* 33 (19): 3098–3100.
- 545 Heckmann, David, Colton J. Lloyd, Nathan Mih, Yuanchi Ha, Daniel C. Zielinski, Zachary B.  
546 Haiman, Abdelmoneim Amer Desouki, Martin J. Lercher, and Bernhard O. Palsson.  
547 2018. "Machine Learning Applied to Enzyme Turnover Numbers Reveals Protein  
548 Structural Correlates and Improves Metabolic Models." *Nature Communications* 9 (1):  
549 5252.
- 550 Hirose, Shuichi, and Tamotsu Noguchi. 2013. "ESPRESSO: A System for Estimating Protein  
551 Expression and Solubility in Protein Expression Systems." *Proteomics* 13 (9): 1444–56.
- 552 Hou, Qingzhen, Raphaël Bourgeas, Fabrizio Pucci, and Marianne Rooman. 2018.  
553 "Computational Analysis of the Amino Acid Interactions That Promote or Decrease  
554 Protein Solubility." *Scientific Reports*. <https://doi.org/10.1038/s41598-018-32988-w>.
- 555 Hou, Qingzhen, Jean-Marc Kwasigroch, Marianne Rooman, and Fabrizio Pucci. 2019.  
556 "SOLart: A Structure-Based Method to Predict Protein Solubility and Aggregation."  
557 *Bioinformatics*, October. <https://doi.org/10.1093/bioinformatics/btz773>.
- 558 Huang, Hui-Ling, Phasit Charoenkwan, Te-Fen Kao, Hua-Chin Lee, Fang-Lin Chang,  
559 Wen-Lin Huang, Shinn-Jang Ho, Li-Sun Shu, Wen-Liang Chen, and Shinn-Ying Ho.  
560 2012. "Prediction and Analysis of Protein Solubility Using a Novel Scoring Card Method  
561 with Dipeptide Composition." *BMC Bioinformatics* 13 Suppl 17 (December): S3.
- 562 Idicula-Thomas, Susan, and Petety V. Balaji. 2005. "Understanding the Relationship  
563 between the Primary Structure of Proteins and Its Propensity to Be Soluble on  
564 Overexpression in Escherichia Coli." *Protein Science: A Publication of the Protein  
565 Society* 14 (3): 582–92.
- 566 Jia, Baolei, and Che Ok Jeon. 2016. "High-Throughput Recombinant Protein Expression in  
567 Escherichia Coli: Current Status and Future Perspectives." *Open Biology* 6 (8).  
568 <https://doi.org/10.1098/rsob.160196>.
- 569 Karplus, P. A., and G. E. Schulz. 1985. "Prediction of Chain Flexibility in Proteins." *Die  
570 Naturwissenschaften* 72 (4): 212–13.
- 571 Khurana, Sameer, Reda Rawi, Khalid Kunji, Gwo-Yu Chuang, Halima Bensmail, and  
572 Raghvendra Mall. 2018. "DeepSol: A Deep Learning Framework for Sequence-Based  
573 Protein Solubility Prediction." *Bioinformatics* 34 (15): 2605–13.
- 574 Kramer, Ryan M., Varad R. Shende, Nicole Motl, C. Nick Pace, and J. Martin Scholtz. 2012.  
575 "Toward a Molecular Understanding of Protein Solubility: Increased Negative Surface  
576 Charge Correlates with Increased Solubility." *Biophysical Journal*.  
577 <https://doi.org/10.1016/j.bpj.2012.01.060>.
- 578 Kuriata, Aleksander, Valentin Iglesias, Jordi Pujols, Mateusz Kurcinski, Sebastian Kmiecik,  
579 and Salvador Ventura. 2019. "Aggrescan3D (A3D) 2.0: Prediction and Engineering of  
580 Protein Solubility." *Nucleic Acids Research* 47 (W1): W300–307.
- 581 Kyte, J., and R. F. Doolittle. 1982. "A Simple Method for Displaying the Hydrophobic  
582 Character of a Protein." *Journal of Molecular Biology* 157 (1): 105–32.



- 583 Lebediker, Mario, and Tsafi Danieli. 2014. "Production of Prone-to-Aggregate Proteins."  
584 *FEBS Letters* 588 (2): 236–46.
- 585 Levy, E. D., S. De, and S. A. Teichmann. 2012. "Cellular Crowding Imposes Global  
586 Constraints on the Chemistry and Evolution of Proteomes." *Proceedings of the National  
587 Academy of Sciences*. <https://doi.org/10.1073/pnas.1209312109>.
- 588 Ma, Jianpeng. 2005. "Usefulness and Limitations of Normal Mode Analysis in Modeling  
589 Dynamics of Biomolecular Complexes." *Structure* 13 (3): 373–80.
- 590 Marra, Marco A., Steven J. M. Jones, Caroline R. Astell, Robert A. Holt, Angela  
591 Brooks-Wilson, Yaron S. N. Butterfield, Jaswinder Khattra, et al. 2003. "The Genome  
592 Sequence of the SARS-Associated Coronavirus." *Science* 300 (5624): 1399–1404.
- 593 McKinney, Wes. 2010. "Data Structures for Statistical Computing in Python." In *Proceedings  
594 of the 9th Python in Science Conference*, 51–56.
- 595 Millman, K. J., and M. Aivazis. 2011. "Python for Scientists and Engineers." *Computing in  
596 Science Engineering* 13 (2): 9–12.
- 597 Natan, Eviatar, Tamaki Endoh, Liora Haim-Vilmovsky, Tilman Flock, Guilhem Chalancon,  
598 Jonathan T. S. Hopper, Bálint Kintsés, et al. 2018. "Cotranslational Protein Assembly  
599 Imposes Evolutionary Constraints on Homomeric Proteins." *Nature Structural &  
600 Molecular Biology* 25 (3): 279–88.
- 601 Nelder, J. A., and R. Mead. 1965. "A Simplex Method for Function Minimization." *Computer  
602 Journal* 7 (4): 308–13.
- 603 Niwa, Tatsuya, Bei-Wen Ying, Katsuyo Saito, Wenzhen Jin, Shoji Takada, Takuya Ueda, and  
604 Hideki Taguchi. 2009. "Bimodal Protein Solubility Distribution Revealed by an  
605 Aggregation Analysis of the Entire Ensemble of Escherichia Coli Proteins." *Proceedings  
606 of the National Academy of Sciences of the United States of America* 106 (11): 4201–6.
- 607 Oliphant, T. E. 2007. "Python for Scientific Computing." *Computing in Science Engineering* 9  
608 (3): 10–20.
- 609 Pedregosa, Fabian, Gaël Varoquaux, Alexandre Gramfort, Vincent Michel, Bertrand Thirion,  
610 Olivier Grisel, Mathieu Blondel, et al. 2011. "Scikit-Learn: Machine Learning in Python."  
611 *Journal of Machine Learning Research: JMLR* 12 (Oct): 2825–30.
- 612 Potter, Simon C., Aurélien Luciani, Sean R. Eddy, Youngmi Park, Rodrigo Lopez, and Robert  
613 D. Finn. 2018. "HMMER Web Server: 2018 Update." *Nucleic Acids Research* 46 (W1):  
614 W200–204.
- 615 Radivojac, P. 2004. "Protein Flexibility and Intrinsic Disorder." *Protein Science*.  
616 <https://doi.org/10.1110/ps.03128904>.
- 617 Ragone, R., F. Facchiano, A. Facchiano, A. M. Facchiano, and G. Colonna. 1989. "Flexibility  
618 Plot of Proteins." *Protein Engineering, Design and Selection*.  
619 <https://doi.org/10.1093/protein/2.7.497>.
- 620 Rawi, Reda, Raghvendra Mall, Khalid Kunji, Chen-Hsiang Shen, Peter D. Kwong, and  
621 Gwo-Yu Chuang. 2018. "PaRSnIP: Sequence-Based Protein Solubility Prediction Using  
622 Gradient Boosting Machine." *Bioinformatics*.  
623 <https://doi.org/10.1093/bioinformatics/btx662>.
- 624 Rosano, Germán L., and Eduardo A. Ceccarelli. 2014. "Recombinant Protein Expression in  
625 Escherichia Coli: Advances and Challenges." *Frontiers in Microbiology* 5 (April): 172.
- 626 Schlessinger, Avner, and Burkhard Rost. 2005. "Protein Flexibility and Rigidity Predicted  
627 from Sequence." *Proteins* 61 (1): 115–26.
- 628 Seabold, Skipper, and Josef Perktold. 2010. "Statsmodels: Econometric and Statistical  
629 Modeling with Python." In *Proceedings of the 9th Python in Science Conference*.  
630 <http://conference.scipy.org/proceedings/scipy2010/pdfs/seabold.pdf>.
- 631 Seiler, Catherine Y., Jin G. Park, Amit Sharma, Preston Hunter, Padmini Surapaneni, Casey  
632 Sedillo, James Field, et al. 2014. "DNASU Plasmid and PSI:BiologY-Materials  
633 Repositories: Resources to Accelerate Biological Research." *Nucleic Acids Research* 42

- 634 (Database issue): D1253–60.
- 635 Smith, David K., Predrag Radivojac, Zoran Obradovic, A. Keith Dunker, and Guang Zhu.
- 636 2003. “Improved Amino Acid Flexibility Parameters.” *Protein Science: A Publication of*
- 637 *the Protein Society* 12 (5): 1060–72.
- 638 Sormanni, Pietro, Leanne Amery, Sofia Ekizoglou, Michele Vendruscolo, and Bojana
- 639 Popovic. 2017. “Rapid and Accurate in Silico Solubility Screening of a Monoclonal
- 640 Antibody Library.” *Scientific Reports* 7 (1): 8200.
- 641 Sormanni, Pietro, Francesco A. Aprile, and Michele Vendruscolo. 2015. “The CamSol
- 642 Method of Rational Design of Protein Mutants with Enhanced Solubility.” *Journal of*
- 643 *Molecular Biology*. <https://doi.org/10.1016/j.jmb.2014.09.026>.
- 644 Stewart, E. J., F. Aslund, and J. Beckwith. 1998. “Disulfide Bond Formation in the
- 645 Escherichia Coli Cytoplasm: An in Vivo Role Reversal for the Thioredoxins.” *The EMBO*
- 646 *Journal* 17 (19): 5543–50.
- 647 Tartaglia, Gian Gaetano, Andrea Cavalli, Riccardo Pellarin, and Amedeo Caflisch. 2004.
- 648 “The Role of Aromaticity, Exposed Surface, and Dipole Moment in Determining Protein
- 649 Aggregation Rates.” *Protein Science: A Publication of the Protein Society* 13 (7): 1939.
- 650 Teague, Simon J. 2003. “Implications of Protein Flexibility for Drug Discovery.” *Nature*
- 651 *Reviews. Drug Discovery* 2 (7): 527–41.
- 652 Trevino, Saul R., J. Martin Scholtz, and C. Nick Pace. 2007. “Amino Acid Contribution to
- 653 Protein Solubility: Asp, Glu, and Ser Contribute More Favorably than the Other
- 654 Hydrophilic Amino Acids in RNase Sa.” *Journal of Molecular Biology*.
- 655 <https://doi.org/10.1016/j.jmb.2006.10.026>.
- 656 Tsumoto, Kouhei, Daisuke Ejima, Izumi Kumagai, and Tsutomu Arakawa. 2003. “Practical
- 657 Considerations in Refolding Proteins from Inclusion Bodies.” *Protein Expression and*
- 658 *Purification* 28 (1): 1–8.
- 659 Vihinen, Mauno. 1987. “Relationship of Protein Flexibility to Thermostability.” *Protein*
- 660 *Engineering, Design and Selection*.” <https://doi.org/10.1093/protein/1.6.477>.
- 661 Vihinen, M., E. Torkkila, and P. Riikonen. 1994. “Accuracy of Protein Flexibility Predictions.”
- 662 *Proteins* 19 (2): 141–49.
- 663 Waldo, Geoffrey S. 2003. “Genetic Screens and Directed Evolution for Protein Solubility.”
- 664 *Current Opinion in Chemical Biology* 7 (1): 33–38.
- 665 Walt, Stéfan van der, S. Chris Colbert, and Gaël Varoquaux. 2011. “The NumPy Array: A
- 666 Structure for Efficient Numerical Computation.” *Computing in Science & Engineering* 13
- 667 (2): 22–30.
- 668 Wang, Xiaoling, Tapan K. Das, Satish K. Singh, and Sandeep Kumar. 2009. “Potential
- 669 Aggregation Prone Regions in Biotherapeutics: A Survey of Commercial Monoclonal
- 670 Antibodies.” *mAbs* 1 (3): 254–67.
- 671 Warwicker, Jim, Spyros Charonis, and Robin A. Curtis. 2014. “Lysine and Arginine Content
- 672 of Proteins: Computational Analysis Suggests a New Tool for Solubility Design.”
- 673 *Molecular Pharmaceutics* 11 (1): 294–303.
- 674 Waskom, Michael, Olga Botvinnik, Paul Hobson, John B. Cole, Yaroslav Halchenko, Stephan
- 675 Hoyer, Alistair Miles, et al. 2014. “Seaborn: v0.5.0 (November 2014),” November.
- 676 <https://doi.org/10.5281/zenodo.12710>.
- 677 Wilkinson, D. L., and R. G. Harrison. 1991. “Predicting the Solubility of Recombinant
- 678 Proteins in Escherichia Coli.” *Bio/technology* 9 (5): 443–48.
- 679 Wu, Fan, Su Zhao, Bin Yu, Yan-Mei Chen, Wen Wang, Yi Hu, Zhi-Gang Song, et al. 2020.
- 680 “Complete Genome Characterisation of a Novel Coronavirus Associated with Severe
- 681 Human Respiratory Disease in Wuhan, China.” *bioRxiv*.
- 682 <https://doi.org/10.1101/2020.01.24.919183>.
- 683 Wu, Zachary, S. B. Jennifer Kan, Russell D. Lewis, Bruce J. Wittmann, and Frances H.
- 684 Arnold. 2019. “Machine Learning-Assisted Directed Protein Evolution with Combinatorial

- 685 Libraries." *Proceedings of the National Academy of Sciences of the United States of*  
686 *America* 116 (18): 8852–58.
- 687 Xiao, Nan, Dong-Sheng Cao, Min-Feng Zhu, and Qing-Song Xu. 2015. "protr/ProtrWeb: R  
688 Package and Web Server for Generating Various Numerical Representation Schemes of  
689 Protein Sequences." *Bioinformatics* 31 (11): 1857–59.
- 690 Xiao, Rong, Stephen Anderson, James Aramini, Rachel Belote, William A. Buchwald,  
691 Colleen Ciccocanti, Ken Conover, et al. 2010. "The High-Throughput Protein Sample  
692 Production Platform of the Northeast Structural Genomics Consortium." *Journal of*  
693 *Structural Biology* 172 (1): 21–33.
- 694 Yang, Kevin K., Zachary Wu, and Frances H. Arnold. 2019. "Machine-Learning-Guided  
695 Directed Evolution for Protein Engineering." *Nature Methods* 16 (8): 687–94.
- 696 Yin, Hui, Yi-Zhou Li, and Meng-Long Li. 2011. "On the Relation between Residue Flexibility  
697 and Residue Interactions in Proteins." *Protein and Peptide Letters* 18 (5): 450–56.
- 698 Yuan, Zheng, Timothy L. Bailey, and Rohan D. Teasdale. 2005. "Prediction of Protein  
699 B-Factor Profiles." *Proteins: Structure, Function, and Bioinformatics*.  
700 <https://doi.org/10.1002/prot.20375>.
